# Supplementary material
Source: PubMed Central journal article supplement (PMC7953312)
Supplement: NIHMS1572979-supplement-SI_file.pdf [file NIHMS1572979-supplement-SI_file.pdf]

# Supporting Information

## **Tailoring pore geometry and chemistry in microporous metal–organic frameworks for high methane storage working capacity**

Kai Shao,<sup>a</sup> Jiyan Pei,<sup>a</sup> Jia-Xin Wang,<sup>a</sup> Yu Yang,<sup>a</sup> Yuanjing Cui,<sup>a</sup> Wei Zhou,<sup>b</sup> Taner Yildirim,<sup>b</sup> Bin Li,<sup>\*,a</sup> Banglin Chen,<sup>c</sup> Guodong Qian<sup>\*,a</sup>

<sup>a</sup> State Key Laboratory of Silicon Materials, Cyrus Tang Center for Sensor Materials and Applications, Department of Materials Science & Engineering, Zhejiang University, Hangzhou 310027, China. E-mail: bin.li@zju.edu.cn; gdqian@zju.edu.cn

<sup>b</sup> NIST Center for Neutron Research, National Institute of Standards and Technology, Gaithersburg, Maryland 20899-6102, United States

<sup>c</sup> Department of Chemistry, University of Texas at San Antonio, One UTSA Circle, San Antonio, Texas 78249-0698, USA. Fax: (+1)-210-458-7428

## 1. Materials and General Methods

All the chemicals were commercially available and used without further purification.  $^1\text{H}$  NMR spectra were recorded on a Bruker Advance DMX500 spectrometer using tetramethylsilane(TMS) as an internal standard. Elemental analyses for C, H, and N were performed on an EA1112 microelemental analyzer. Powder X-ray diffraction (PXRD) patterns were collected in the  $2\theta=3-45^\circ$  range on an X'Pert PRO diffractometer with Cu  $K_\alpha$  radiation ( $\lambda=1.542\text{\AA}$ ) at room temperature. Thermogravimetric analyses (TGA) were conducted on a Netzsch TGA 209 F3 thermogravimeter with a heating rate of  $5\text{ }^\circ\text{C min}^{-1}$  in a  $\text{N}_2$  atmosphere.

## 2. Gas sorption Measurements

A Micromeritics ASAP 2020 surface area analyzer was used to measure gas adsorption isotherms. To remove all the guest solvents in the framework, the fresh samples of ZJU-105 and PCN-46 were guest-exchanged with dry acetone at least 10 times, filtered and degassed at room temperature for 1 day and then at 373 K for another 9 h until the minimal pressure before the measurements were made. The activated samples of ZJU-105 and PCN-46 were maintained at 77 K with liquid nitrogen. High-pressure  $\text{CH}_4$  sorption isotherms were measured using a Sieverts-type apparatus. A detailed description of the experimental setup, calibration and the isotherm has been published previously.<sup>1</sup>

## 3. X-ray Crystallography

The crystal data were collected on an Agilent Supernova CCD diffractometer equipped with a graphite-monochromatic enhanced Cu  $K_\alpha$  radiation ( $\lambda = 1.54184\text{ \AA}$ ) at 296 K. The datasets were corrected by empirical absorption correction using spherical harmonics, implemented in the SCALE3 ABSPACK scaling algorithm. The structure was solved by direct methods using SIR92 and refined by full matrix least-squares methods with the SHELX-2014 program package. The solvent molecules in the compound are highly disordered. The SQUEEZE subroutine of the PLATON software suite was used to remove the scattering from the highly disordered guest molecules.<sup>2</sup> The resulting new files were used to further refine the structures. The H atoms on C atoms were generated geometrically. Crystal data are summarized in Table S1.

## 4. Derivation of the isosteric heat of adsorption ( $Q_{st}$ )

A virial type expression of the following form was used to fit the CH<sub>4</sub> total adsorption isotherm data at 273 K and 298 K.

$$\ln P = \ln N + 1/T \sum_{i=0}^m a_i N^i + \sum_{i=0}^n b_i N^i$$

Here,  $P$  is the pressure expressed in bar,  $N$  is the amount adsorbed in cc(STP)/cc,  $T$  is the temperature in K,  $a_i$  and  $b_i$  are virial coefficients, and  $m$ ,  $n$  represents the number of coefficients required to adequately describe the isotherms.  $m$  and  $n$  were gradually increased until the contribution of extra added  $a$  and  $b$  coefficients was deemed to be statistically insignificant towards the overall fit, as determined using the average value of the squared deviations from the experimental values was minimized. The values of the virial coefficients  $a_0$  through  $a_m$  were then used to calculate the isosteric heat of adsorption using the following expression.

$$Q_{st} = -R \sum_{i=0}^m a_i N^i$$

Here,  $Q_{st}$  is the coverage-dependent isosteric heat of adsorption and  $R$  is the universal gas constant of 8.3147 J K<sup>-1</sup>mol<sup>-1</sup>.

### Scheme S1. Synthetic routes to the organic linker H<sub>4</sub>L1

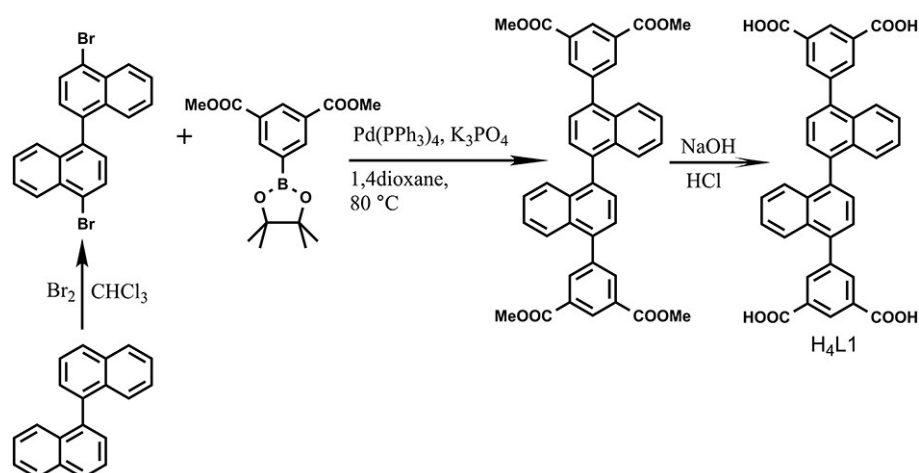

**4,4'-dibromo-1,1'-binaphthalene:** 1,1'-binaphthalene (0.79 g, 3.1 mmol) was dissolved in chloroform (30 mL) and the solution was cooled to 0 °C with an ice-bath. To the solution was added bromine (2.6 g, 16 mmol) over 20 min. After the mixture stirred for 2.5 h, aqueous sodium sulfite was added for quenching. The organic layer was separated and washed with brine, dried over anhydrous sodium sulfate. After filtration, the filtrate was evaporated and the residue was recrystallized from chloroform to give white crystals (0.80 g, 61%). <sup>1</sup>H NMR (500 MHz, Chloroform-d) δ 8.36 (d, *J* = 8.5 Hz, 2H), 7.90 (d, *J* = 7.5 Hz, 2H), 7.60 (td, *J*<sub>1</sub> = 8.4 Hz, *J*<sub>2</sub> = 4.0 Hz, 2H), 7.36–7.31 (m, 6H).

**Tetramethyl 5,5'-([1,1'-binaphthalene]-4,4'-diyl)diisophthalate:** 4,4'-dibromo-1,1'-binaphthalene (0.82 g, 2 mmol), 5-(4,4,5,5-tetramethyl-1,3,2-dioxaborolan-2-yl) isophthalate (2.03 g, 6 mmol), K<sub>3</sub>PO<sub>4</sub> (2.55g, 12 mmol) and tetrakis(triphenylphosphine) palladium(0) (0.1 g, 0.09 mmol) were dissolved in dry 1,4-dioxane (60 mL) under N<sub>2</sub> atmosphere. The mixture was stirred at 80 °C for three days. After removal of organic solvent under vacuum, the residue was washed with water and extracted with dichloromethane. The organic layer was dried with anhydrous MgSO<sub>4</sub> and the solvent was removed under vacuum. The crude product was purified by column chromatography (silica gel, dichloromethane /petroleum ether, 3:1 v/v). Yield: 67% (0.85 g). <sup>1</sup>H NMR (500 MHz, Chloroform-d) δ 8.82 (t, *J* = 1.6 Hz, 2H), 8.50 (d, *J* = 1.7 Hz, 4H), 7.87 (d, *J* = 8.4 Hz, 2H), 7.62 (d, *J* = 7.1 Hz, 2H), 7.58 (d, *J* = 7.1 Hz, 2H), 7.57–7.54 (m, 2H), 7.48 (td, *J*<sub>1</sub> = 8.4 Hz, *J*<sub>2</sub> = 1.3 Hz, 2H), 7.37 (td, *J*<sub>1</sub> = 8.2 Hz, *J*<sub>2</sub> = 1.2 Hz, 2H), 4.00 (s, 12H).

**5,5'-([1,1'-binaphthalene]-4,4'-diyl)diisophthalic acid ( $H_4L1$ ):** tetramethyl 5,5'-([1,1'-binaphthalene]-4,4'-diyl)diisophthalate (0.85 g, 1.3 mmol) was suspended in 50 mL THF, and then a 2M KOH aqueous solution (50 mL) was added. The mixture was stirred under reflux overnight until it became clear. After that THF was removed under reduced pressure and dilute HCl was then added to the remaining aqueous solution to acidify pH = 2. The precipitate was collected by filtration, washed with water for several times, and dried to afford white powder. Yield: 736 mg (95%).  $^1H$  NMR (500 MHz, DMSO- $d_6$ )  $\delta$  13.46 (s, 4H), 8.62 (d,  $J$  = 1.7 Hz, 2H), 8.35 (d,  $J$  = 1.6 Hz, 4H), 7.87 (d,  $J$  = 8.6 Hz, 2H), 7.71 (d,  $J$  = 7.2 Hz, 2H), 7.68 (d,  $J$  = 7.2 Hz, 2H), 7.57 (td,  $J_1$  = 8.3 Hz,  $J_1$  = 2.2 Hz, 2H), 7.47–7.42 (m, 4H).

**Scheme S2.** Synthetic routes to the organic linker  $H_4L2$

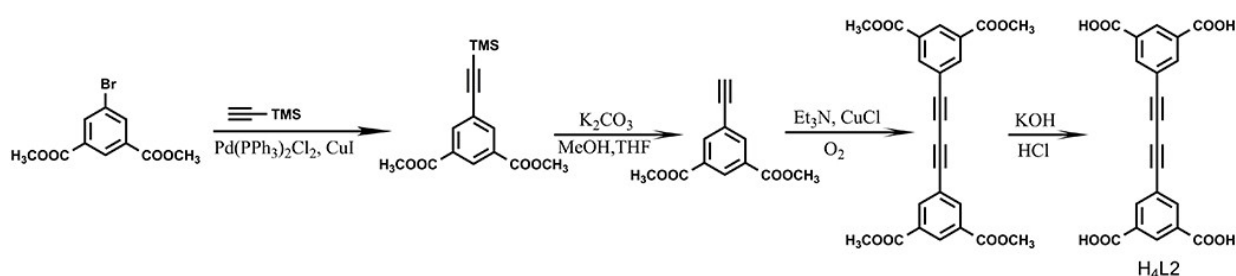

**Dimethyl 5-(2-(trimethylsilyl)ethynyl)isophthalate:** Dimethyl 5-bromoisophthalate (10.00 g, 36.62 mmol), CuI (0.35 g, 1.83 mmol), and Pd(PPh<sub>3</sub>)<sub>2</sub>Cl<sub>2</sub> (1.28 g, 1.83 mmol) were placed in a 500 mL round-bottom flask. The flask was evacuated under vacuum and refilled with N<sub>2</sub> for three times, and then ethynyltrimethylsilane (7.6 mL, 54.93 mmol), dry THF (200 mL) and triethylamine (7.7 mL, 54.93 mmol) were added via syringe sequentially. The resulting solution was stirred under nitrogen at room temperature for 24 h. After removal of the volatile, CH<sub>2</sub>Cl<sub>2</sub> (100 mL) and H<sub>2</sub>O (100 mL) was added. The organic phase was separated, and the aqueous phase was extracted with CH<sub>2</sub>Cl<sub>2</sub>. The organic phase was combined, washed with brine, dried over anhydrous MgSO<sub>4</sub> and filtered. The solvent was removed under vacuum, and the residue was purified using silica gel column chromatography with petroleum ether/ethyl acetate (30/1, v/v) as eluent, affording dimethyl 5-(2-(trimethylsilyl)ethynyl)isophthalate as a yellow solid in 87 % yield (9.2 g).  $^1H$  NMR (500 MHz, Chloroform- $d$ )  $\delta$  8.60 (t,  $J$  = 1.6 Hz, 1H), 8.29 (d,  $J$  = 1.7 Hz, 2H), 3.95 (s, 6H), 0.26 (s, 9H).

**Dimethyl 5-ethynylisophthalate:** A mixture of dimethyl 5-(2-(trimethylsilyl)ethynyl)isophthalate (9.2 g, 31.68 mmol), K<sub>2</sub>CO<sub>3</sub> (0.88 g, 6.30 mmol) in a mixed solvent of THF (70 mL) and MeOH (175 mL) was stirred under a nitrogen atmosphere at room temperature for 24 h. After that, the solvent was removed under vacuum. CH<sub>2</sub>Cl<sub>2</sub> (100 mL) and H<sub>2</sub>O (100 mL) were added. The organic phase was separated, and the aqueous phase was extracted with CH<sub>2</sub>Cl<sub>2</sub>. The organic phase was combined, washed with brine, dried over anhydrous MgSO<sub>4</sub> and filtered. The removal of volatile gave dimethyl 5-ethynylisophthalate in 94 % yield (6.5 g), which is pure enough for the next reactions. <sup>1</sup>H NMR (500 MHz, Chloroform-d) δ 8.63 (t, *J* = 1.6 Hz, 1H), 8.32 (d, *J* = 1.7 Hz, 2H), 3.95 (s, 6H), 3.17 (s, 1H).

**Tetramethyl 5,5'-(buta-1,3-diyne-1,4-diyl)diisophthalate:** Anhydrous Et<sub>3</sub>N (20 ml) and tetrahydrofuran (20 mL) were added to a flask containing a mixture of dimethyl 5-ethynylisophthalate (4.2 g, 19 mmol), Pd(PPh<sub>3</sub>)<sub>2</sub>Cl<sub>2</sub> (0.27 g, 0.38 mmol) and cuprous chloride (0.08 g, 0.77 mmol). The resulting mixture was heated at 50 °C for 24 h during which oxygen was bubbled into the solution. The solvent was removed in vacuo and the residue was extracted with dichloromethane and saturated ammonium chloride solution, and dried over anhydrous MgSO<sub>4</sub>. After filtration and evaporation, flash column chromatography on silica gel using dichloromethane as eluant gave the product. Yield: 3 g (36 %). <sup>1</sup>H NMR (500 MHz, Chloroform-d) δ 8.66 (t, *J* = 1.6 Hz, 2H), 8.36 (d, *J* = 1.6 Hz, 4H), 3.96 (s, 12H).

**5,5'-(buta-1,3-diyne-1,4-diyl)diisophthalic acid (H<sub>4</sub>L<sub>2</sub>):** To a stirred solution of tetramethyl 5,5'-(buta-1,3-diyne-1,4-diyl)diisophthalate (2 g) in methanol/water (V :V = 9 : 1, 60 mL), potassium hydroxide (4.2 g) was added and the mixture was heated at 80 °C for 24 h, then acidified with 6M hydrochloric acid. The precipitate was removed by filtration, washed with water for several times, and dried in vacuo. Yield 1.45 g (83 %). <sup>1</sup>H NMR (500 MHz, DMSO-d<sub>6</sub>) δ 13.57 (s, 4H), 8.49 (t, *J* = 1.7 Hz, 2H), 8.29 (d, *J* = 1.6 Hz, 4H).

### Synthesis of ZJU-105

A mixture of the organic linker H<sub>4</sub>L1 (10 mg, 0.017 mmol) and Cu(NO<sub>3</sub>)<sub>2</sub>·2.5H<sub>2</sub>O (25 mg, 0.107 mmol) was dissolved into a mixed solvent (DMF/H<sub>2</sub>O, 3 mL/0.2 mL) in a screw-capped vial (20 mL), to which 20 μL of 37% HCl was added. The vial was capped and heated in an oven at 80 °C for 72 h. Blue block crystals were obtained by filtrated and washed with DMF several times to afford ZJU-105 in 70% yield. ZJU-105 has a best formula as [Cu<sub>2</sub>L1(H<sub>2</sub>O)<sub>2</sub>]·5DMF·3H<sub>2</sub>O, which was obtained based on single-crystal X-ray structure determination, elemental analysis and TGA. Anal. Calcd for C<sub>51</sub>H<sub>59</sub>N<sub>5</sub>O<sub>18</sub>Cu<sub>2</sub>: C, 51.30; H, 4.95; N, 5.87; found: C, 51.43; H, 4.91; N, 5.81. TGA data for loss of 5 DMF and 5H<sub>2</sub>O: calcd: 38.18 %, found: 38.46 %.

### Synthesis of PCN-46

A mixture of the organic linker H<sub>4</sub>L2 (10 mg, 0.026 mmol) and Cu(NO<sub>3</sub>)<sub>2</sub>·2.5H<sub>2</sub>O (20 mg, 0.086 mmol) was dissolved into a mixed solvent (DMF/EtOH/H<sub>2</sub>O, 2.4 mL/1 mL/1 mL) in a screw-capped vial (20 mL), to which 70 μL HNO<sub>3</sub> was added. The vial was capped and heated in an oven at 85 °C for 24 h. Green block crystals were obtained by filtrated and washed with DMF several times to afford PCN-46 in 68% yield. PCN-46 has a best formula as [Cu<sub>2</sub>L2(H<sub>2</sub>O)<sub>2</sub>]·4DMF·5H<sub>2</sub>O, which was obtained based on single-crystal X-ray structure determination, elemental analysis and TGA. Anal. Calcd for C<sub>32</sub>H<sub>56</sub>N<sub>4</sub>O<sub>19</sub>Cu<sub>2</sub>: C, 41.75; H, 6.09; N, 6.09; found: C, 41.71; H, 6.12; N, 6.14. TGA data for loss of 4DMF and 7H<sub>2</sub>O: calcd: 44 %, found: 44.3 %.

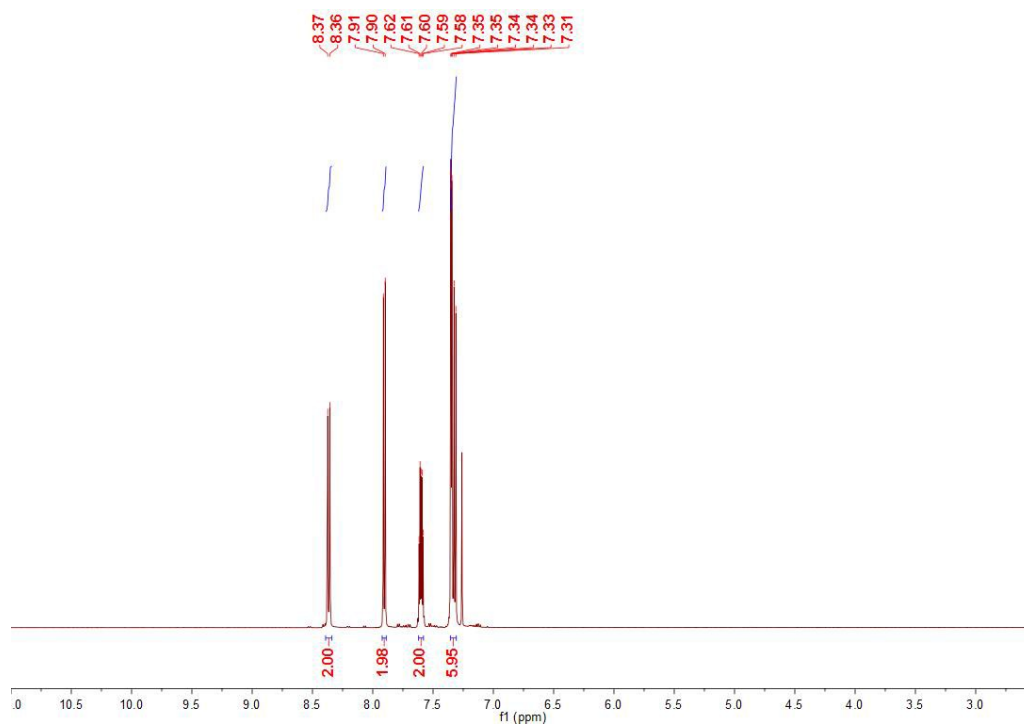

**Figure S1.**  $^1\text{H}$  ( $\text{CDCl}_3$ , 500MHz) spectra of 4,4'-dibromo-1,1'-binaphthalene.

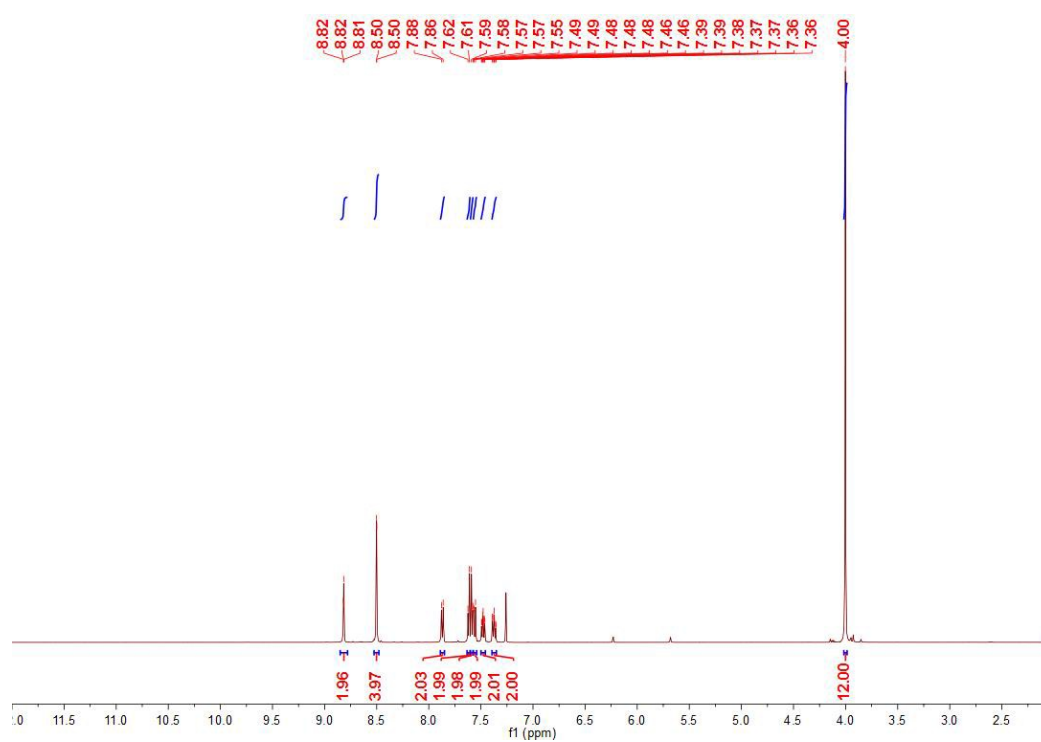

**Figure S2.**  $^1\text{H}$  ( $\text{CDCl}_3$ , 500MHz) spectra of Tetramethyl 5,5'-([1,1'-binaphthalene]-4,4'-diyl)diisophthalate.



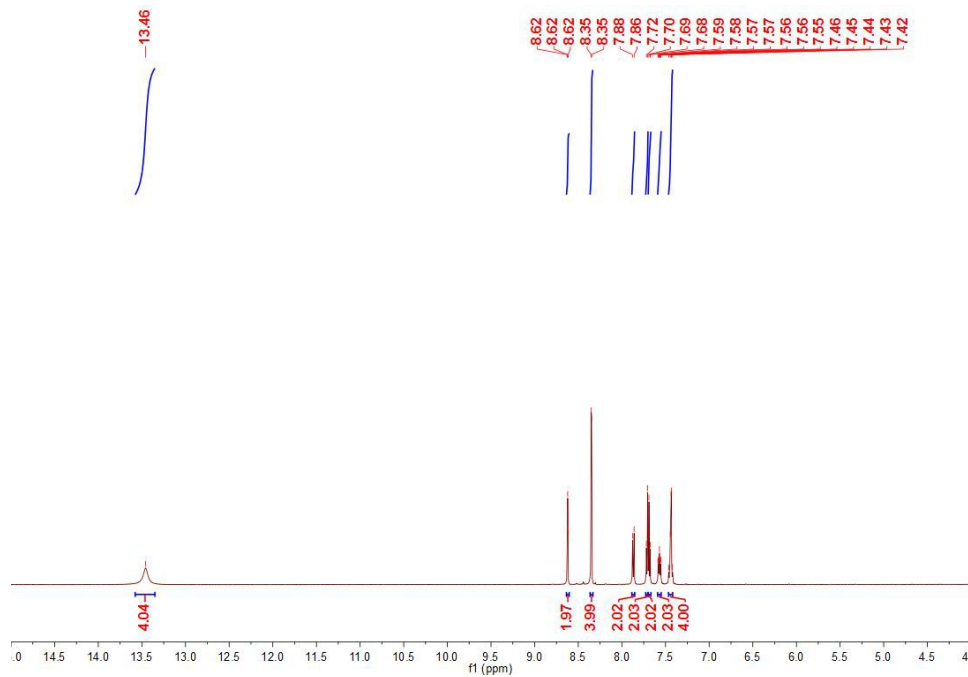

**Figure S3.**  $^1\text{H}$  (DMSO, 500MHz) spectra of 5,5'-([1,1'-binaphthalene]-4,4'-diyl)diisophthalic acid.

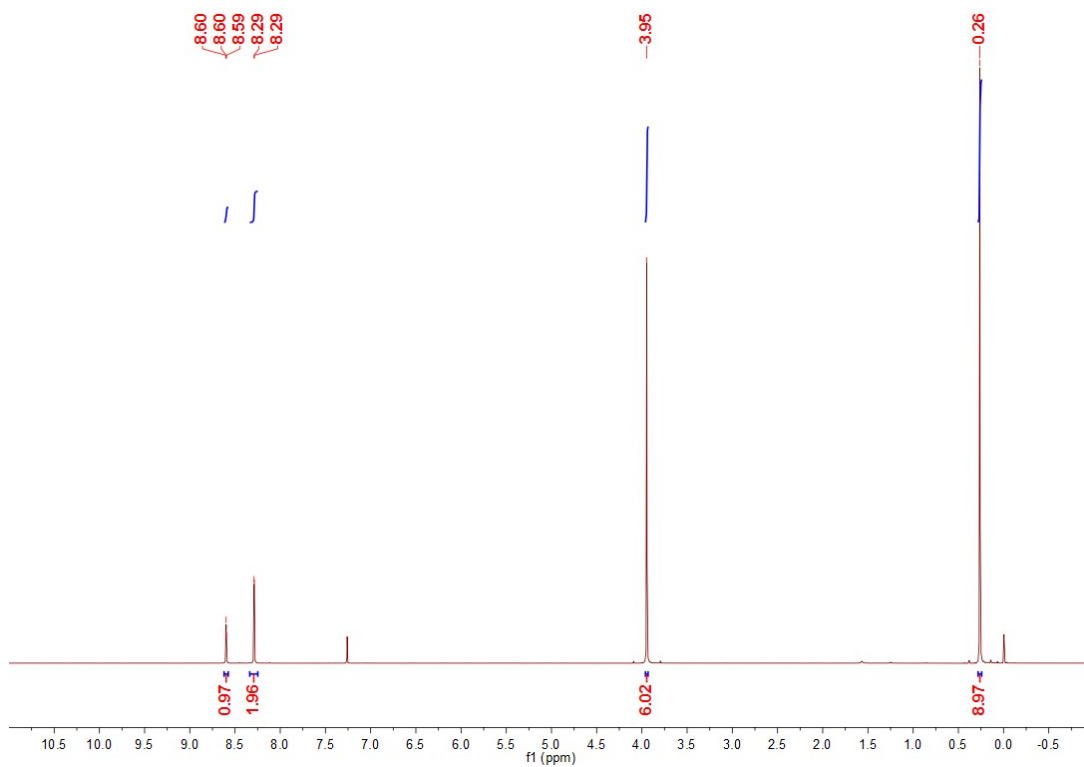

**Figure S4.**  $^1\text{H}$  ( $\text{CDCl}_3$ , 500MHz) spectra of Dimethyl 5-(2-(trimethylsilyl)ethynyl)isophthalate.

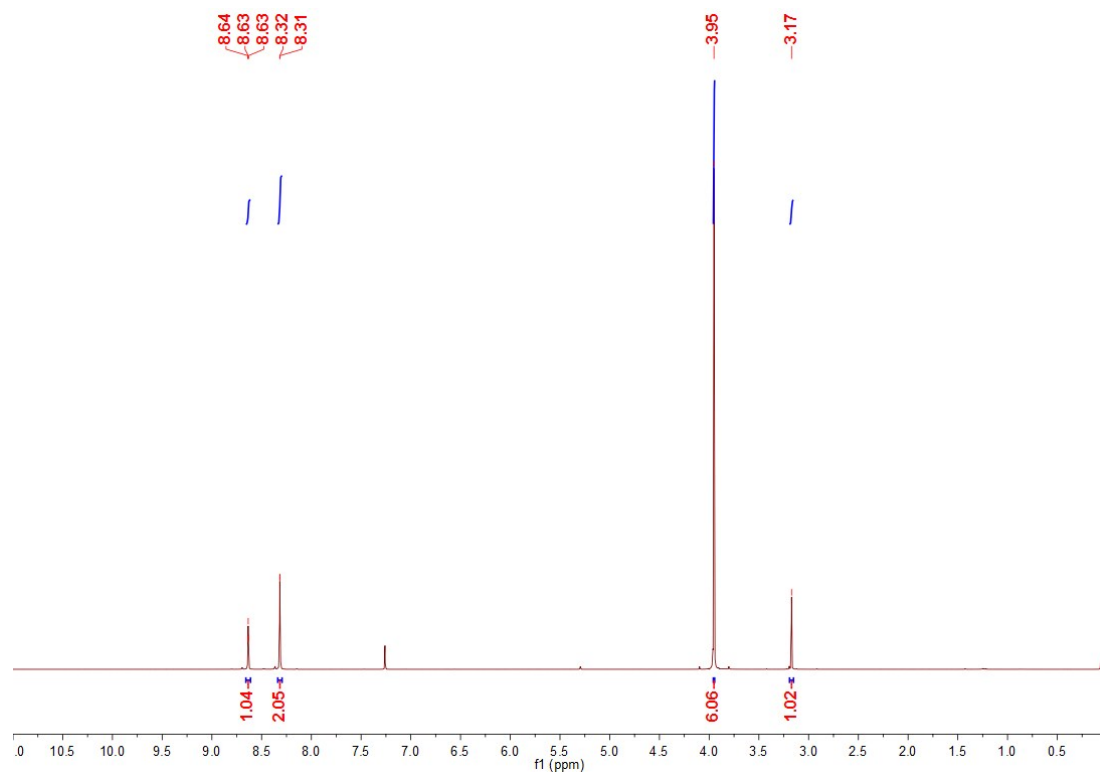

**Figure S5.**  $^1\text{H}$  ( $\text{CDCl}_3$ , 500MHz) spectra of Dimethyl 5-ethynylisophthalate.

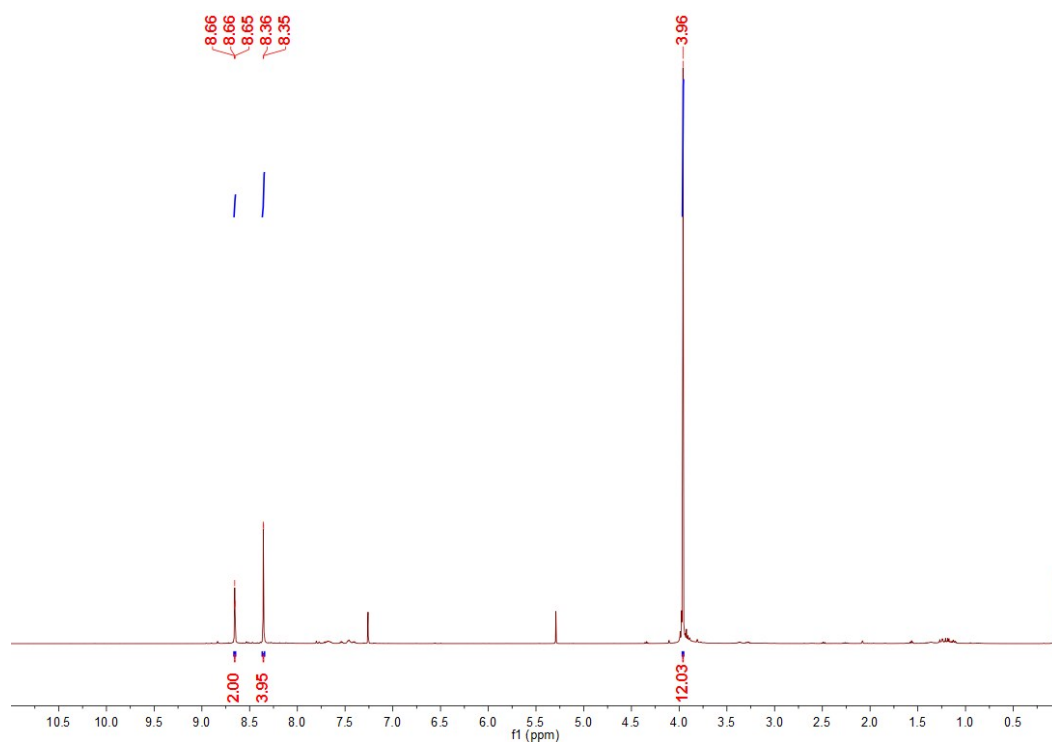

**Figure S6.**  $^1\text{H}$  ( $\text{CDCl}_3$ , 500MHz) spectra of Tetramethyl 5,5'-(buta-1,3-diyne-1,4-diyl)diisophthalate.

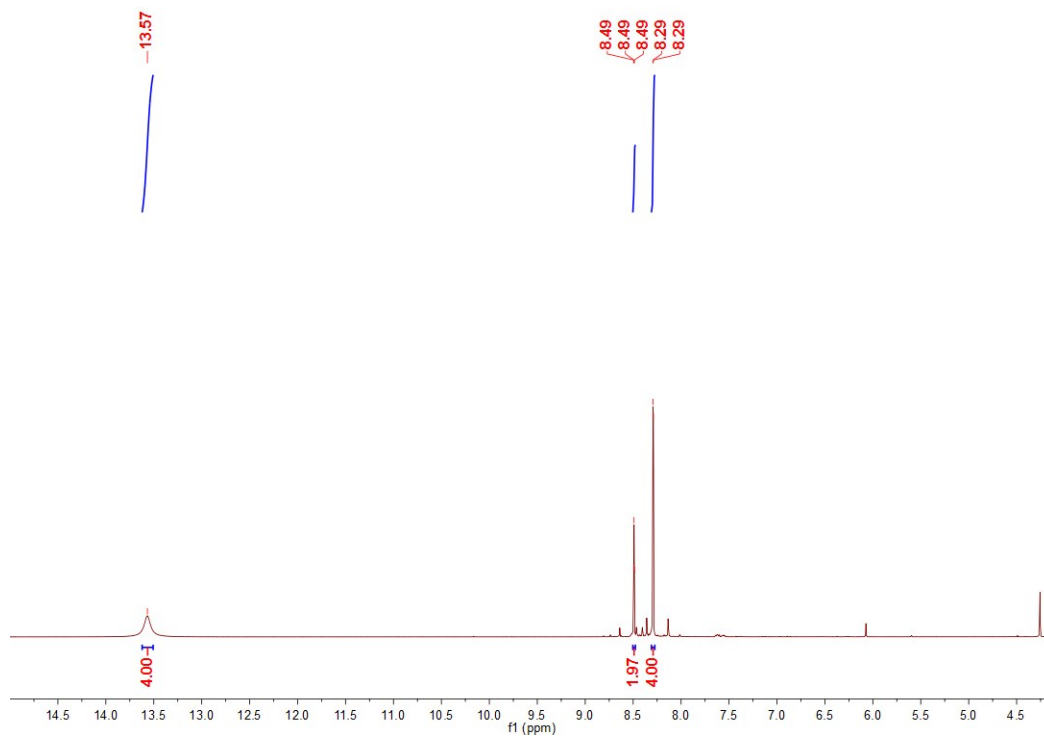

**Figure S7.**  $^1\text{H}$  (DMSO, 500MHz) spectra of 5,5'-(buta-1,3-diyne-1,4-diyl)diisophthalic acid

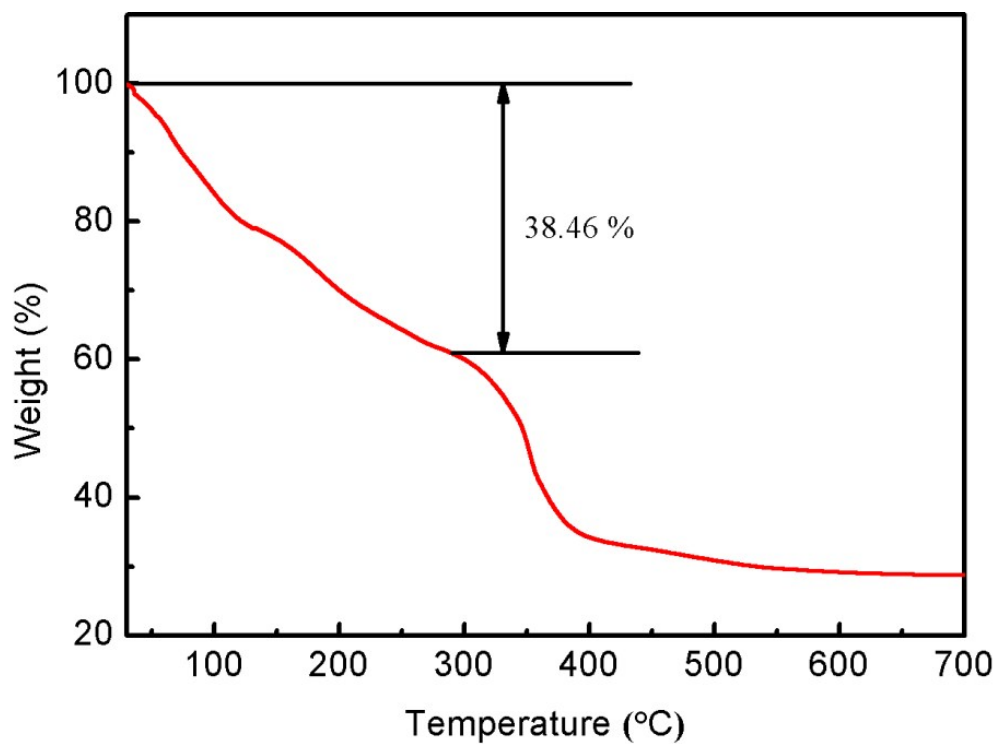

**Figure S8.** TGA curves of as-synthesized ZJU-105.

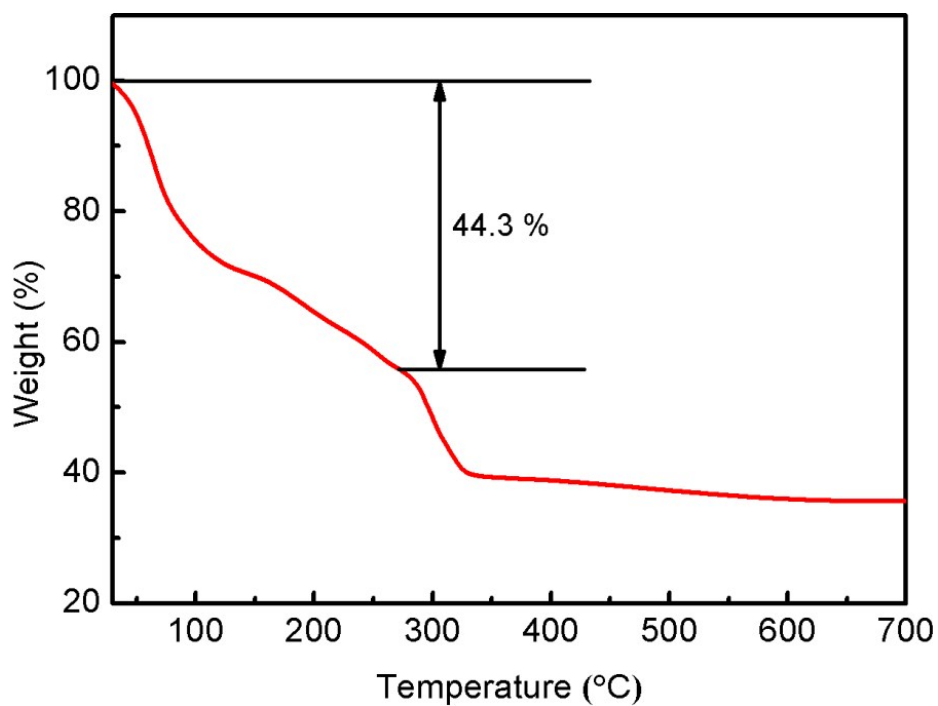

**Figure S9.** TGA curves of as-synthesized PCN-46.

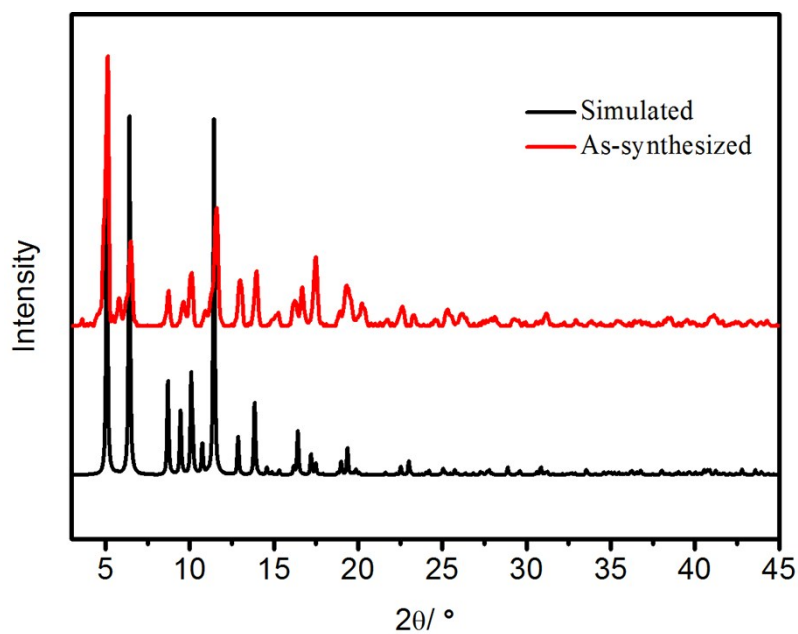

**Figure S10.** PXRD patterns of as-synthesized ZJU-105 (red) along with the simulated XRD pattern from the single-crystal X-ray structure (black).

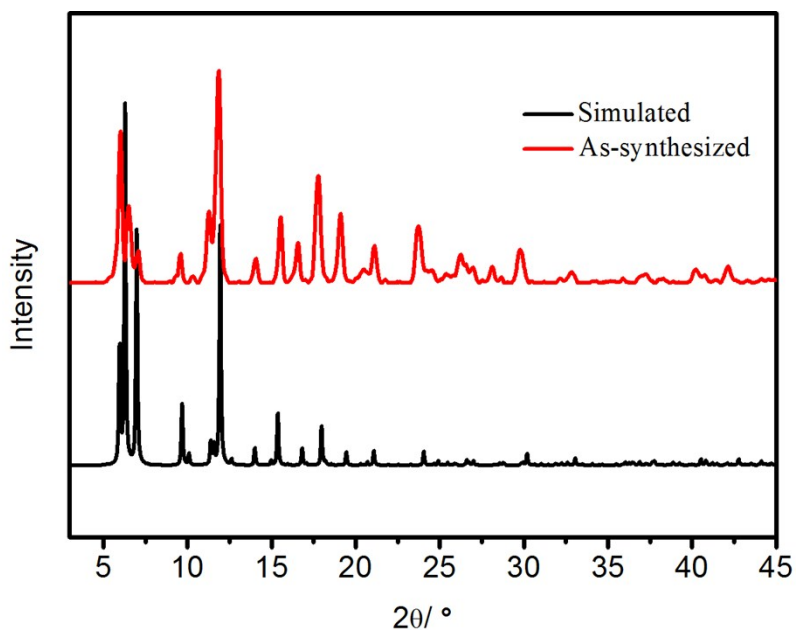

**Figure S11.** PXRD patterns of as-synthesized PCN-46 (red) along with the simulated XRD pattern from the single-crystal X-ray structure (black).

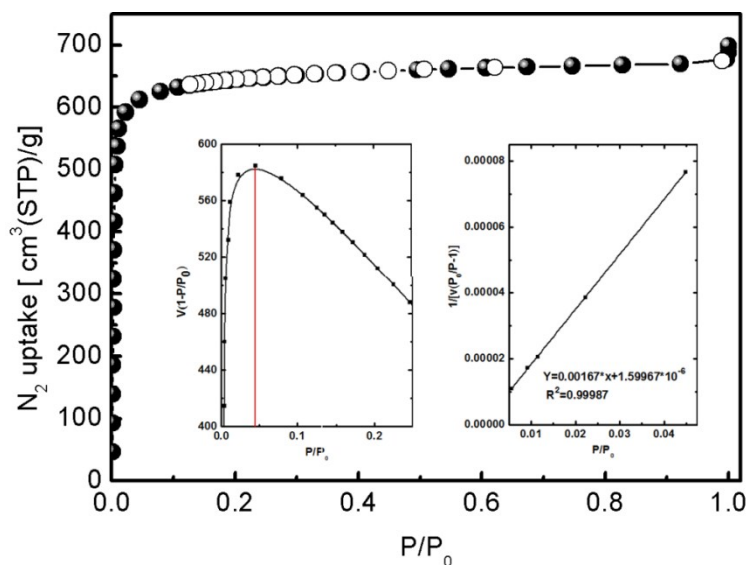

*Experimental values:*

$$S_{\text{BET}} = (1/(0.00167 - 1.59967 \times 10^{-6})) / 22414 \times 6.02 \times 10^{23} \times 0.162 \times 10^{-18} = 2608 \text{ m}^2 \text{ g}^{-1}$$

$$V_p = 1.037 \text{ cm}^3/\text{g}$$

*Theoretical values calculated from the crystal structure:*

$$S_{\text{BET}} = 2452 \text{ m}^2 \text{ g}^{-1}; \quad V_p = 0.96 \text{ cm}^3/\text{g}$$

**Figure S12.**  $\text{N}_2$  sorption isotherms of ZJU-105a at 77 K. Solid symbols: adsorption, open symbols: desorption.

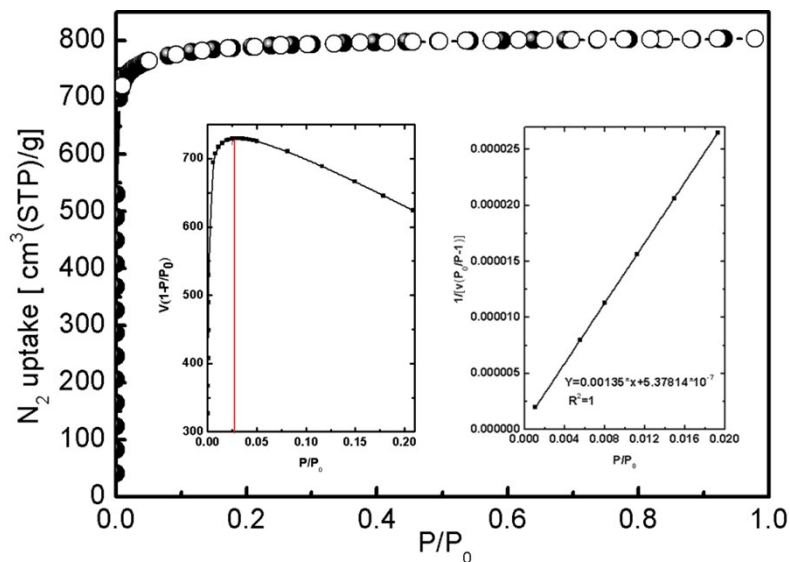

*Experimental values:*

$$S_{\text{BET}} = (1 / (0.00135 - 5.37814 \times 10^{-7})) / 22414 \times 6.02 \times 10^{23} \times 0.162 \times 10^{-18} = 3224 \text{ m}^2 \text{ g}^{-1}$$

$$V_p = 1.243 \text{ cm}^3/\text{g}$$

*Theoretical values calculated from the crystal structure:*

$$S_{\text{BET}} = 3634 \text{ m}^2 \text{ g}^{-1}; \quad V_p = 1.266 \text{ cm}^3/\text{g}$$

**Figure S13.** N<sub>2</sub> sorption isotherms of PCN-46a at 77 K. Solid symbols: adsorption, open symbols: desorption.

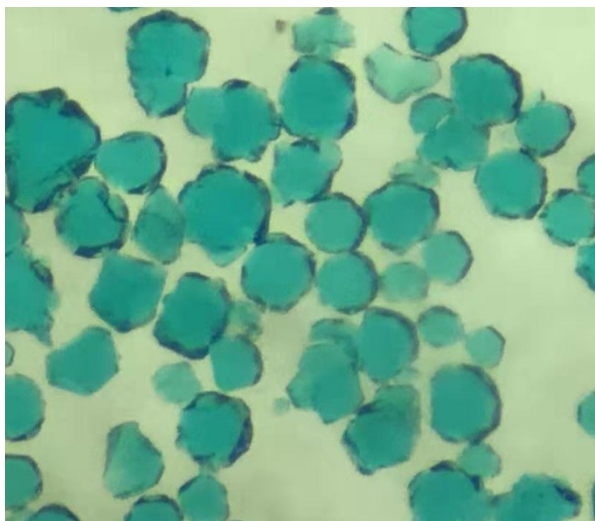

**Figure S14.** Optical images of the as-synthesized crystals of ZJU-105.

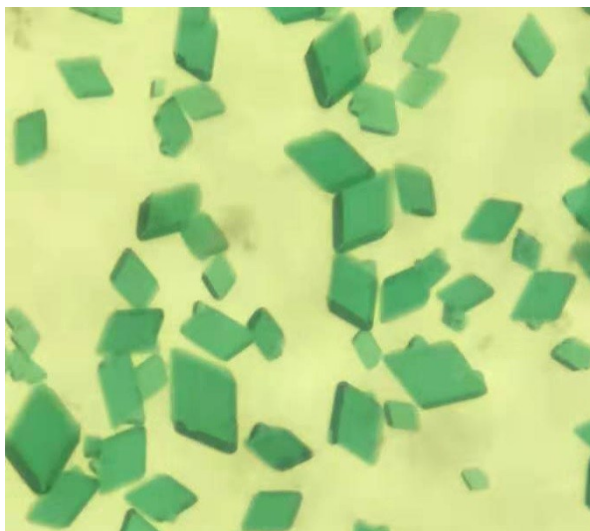

**Figure S15.** Optical images of the as-synthesized crystals of PCN-46.

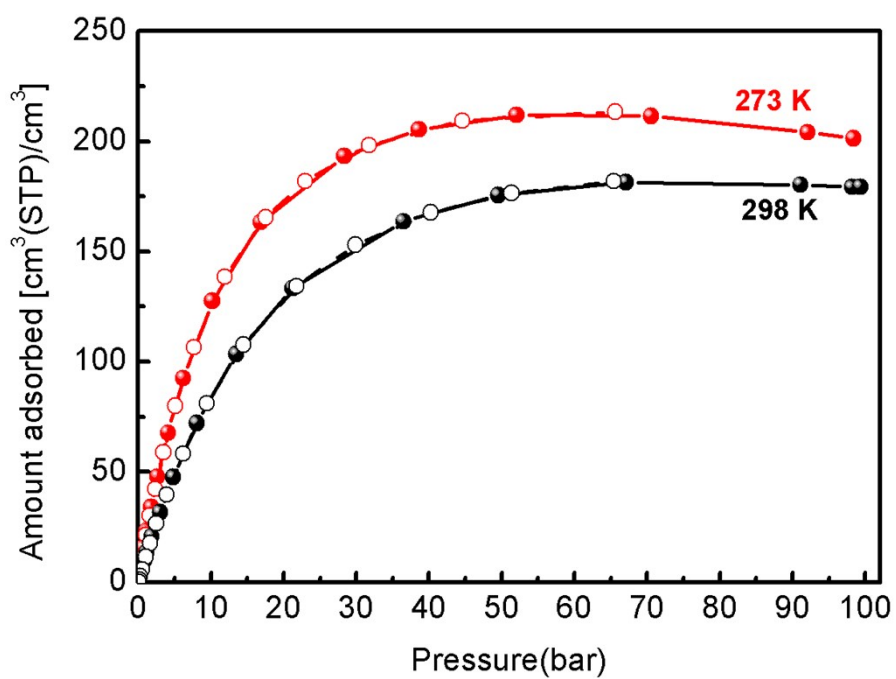

**Figure S16.** Excess volumetric high-pressure methane sorption isotherms of ZJU-105a at different temperatures. Filled and open symbols represent adsorption and desorption data, respectively.

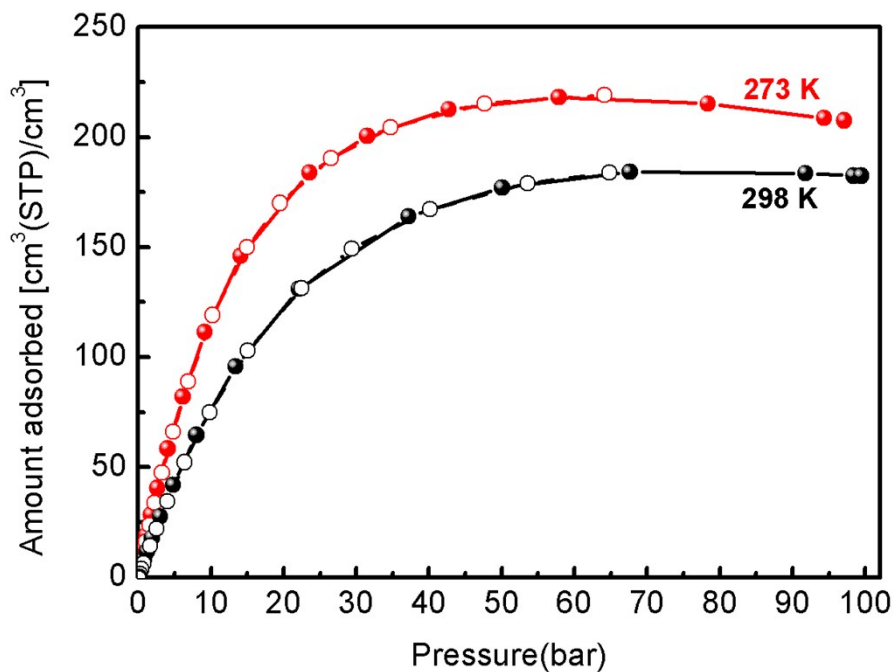

**Figure S17.** Excess volumetric high-pressure methane sorption isotherms of PCN-46a at different temperatures. Filled and open symbols represent adsorption and desorption data, respectively.

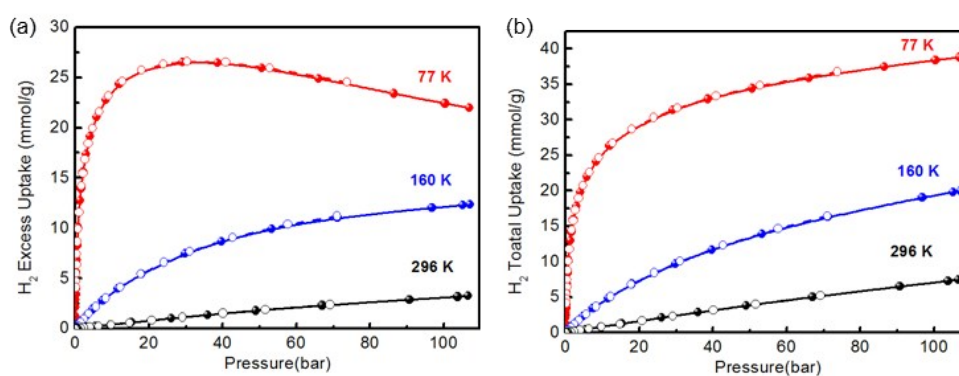

**Figure S18.** Excess (a) and total (b) high-pressure H<sub>2</sub> sorption isotherms of ZJU-105a at different temperatures. Filled and open symbols represent adsorption and desorption data, respectively.



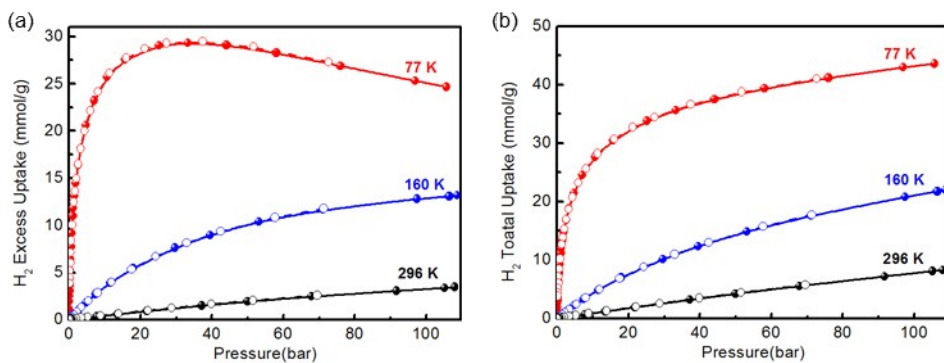

**Figure S19.** Excess (a) and total (b) high-pressure  $H_2$  sorption isotherms of PCN-46a at different temperatures. Filled and open symbols represent adsorption and desorption data, respectively.

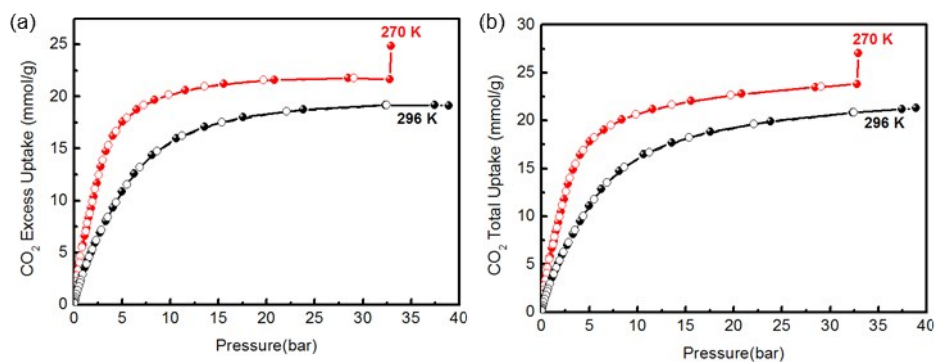

**Figure S20.** Excess (a) and total (b) high-pressure  $CO_2$  sorption isotherms of ZJU-105a at different temperatures. Filled and open symbols represent adsorption and desorption data, respectively.

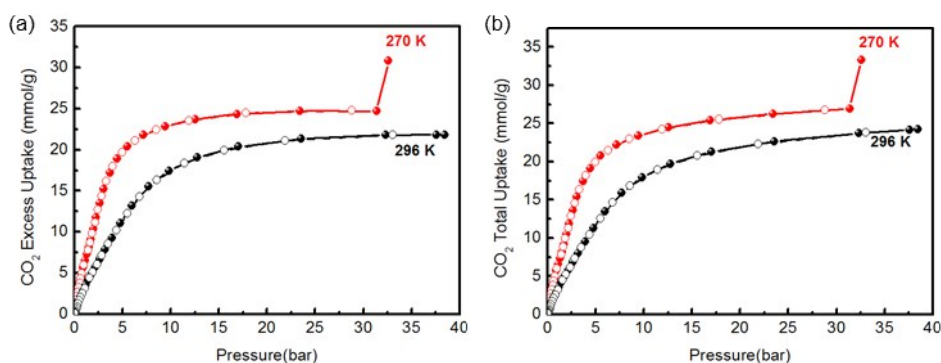

**Figure S21.** Excess (a) and total (b) high-pressure  $CO_2$  sorption isotherms of PCN-46a at different temperatures. Filled and open symbols represent adsorption and desorption data, respectively.

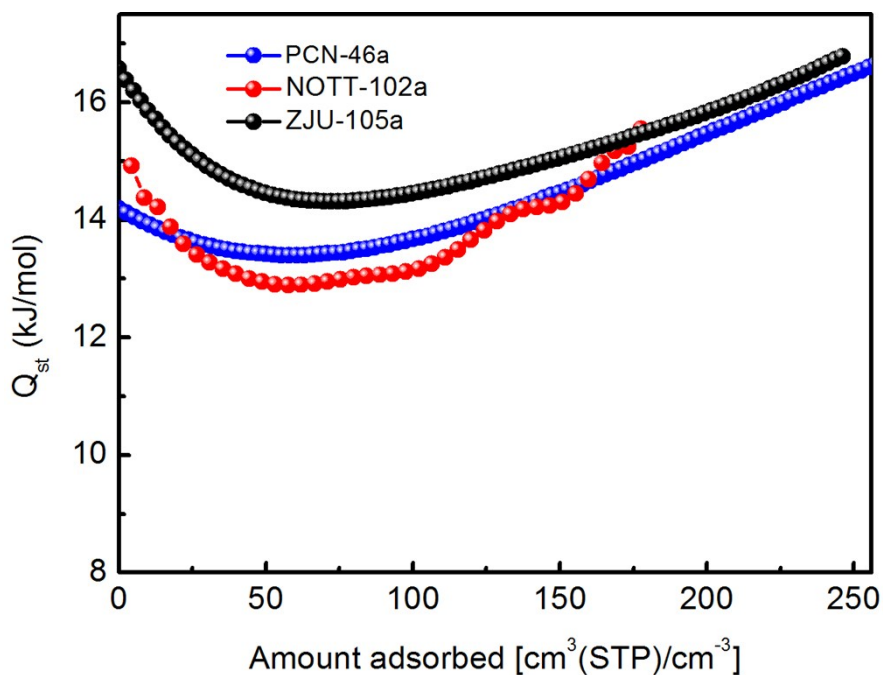

**Figure S22.** Comparison of  $Q_{st}$  for  $\text{CH}_4$  adsorption for ZJU-105a, NOTT-102a, and PCN-46a.

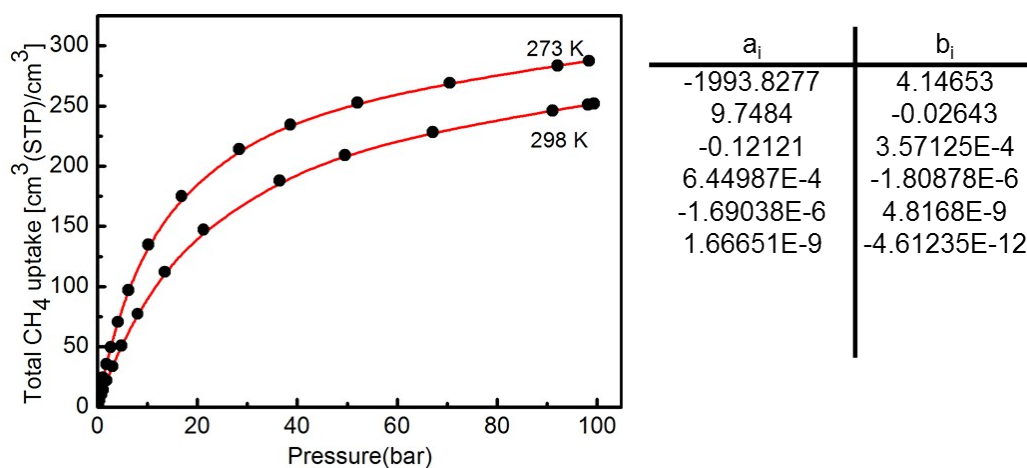

**Figure S23.** Derivation of  $Q_{st}$  for  $\text{CH}_4$  adsorption in ZJU-105a from virial fitting of the total adsorption isotherm data. The virial coefficients are shown on the right.

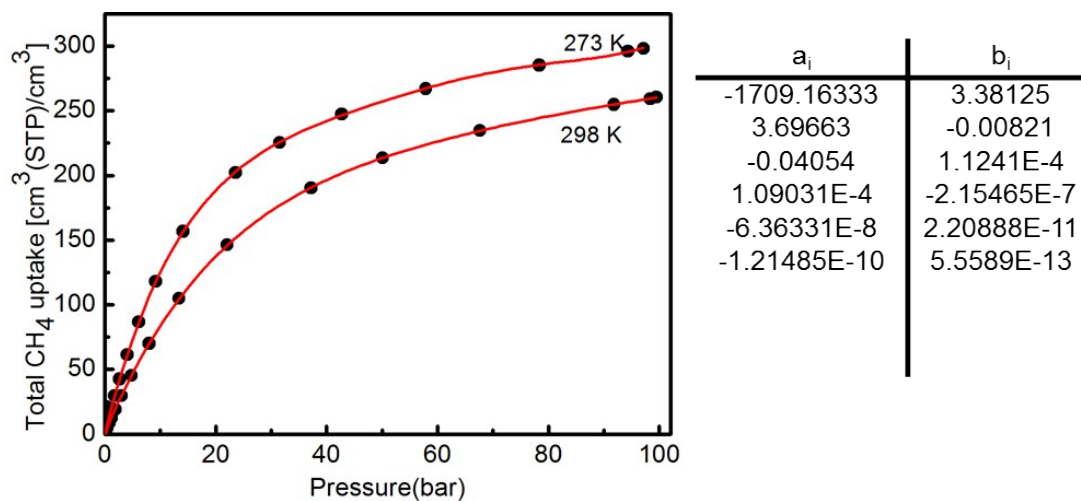

**Figure S24.** Derivation of  $Q_{st}$  for  $\text{CH}_4$  adsorption in PCN-46a from virial fitting of the total adsorption isotherm data. The virial coefficients are shown on the right.

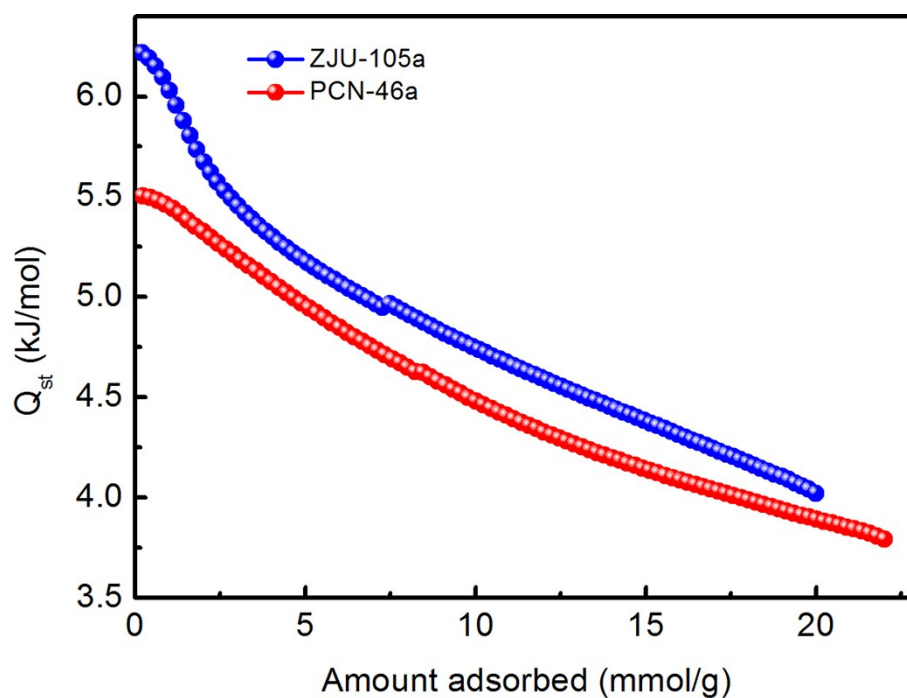

**Figure S25.** Comparison of  $Q_{st}$  for  $\text{H}_2$  adsorption for ZJU-105a and PCN-46a.

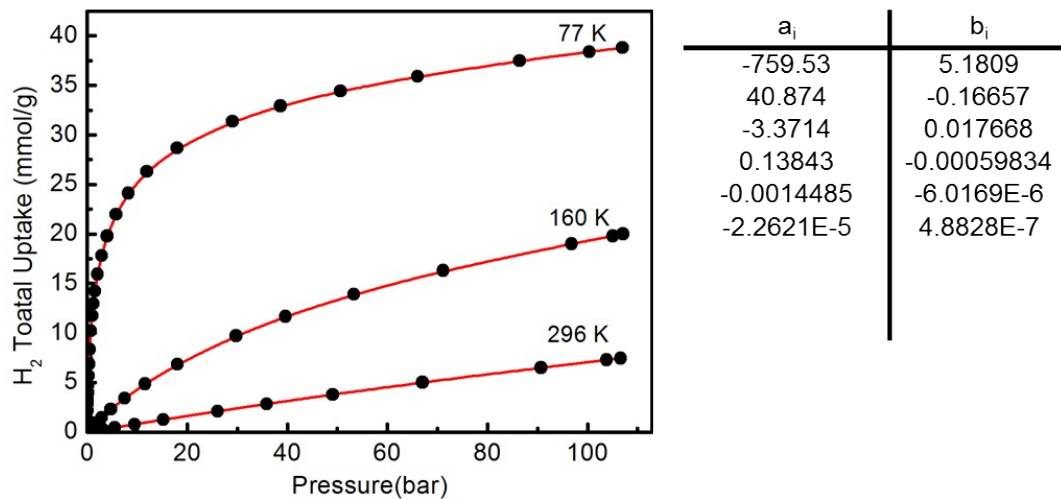

**Figure S26.** Derivation of  $Q_{st}$  for  $H_2$  adsorption in ZJU-105a from virial fitting of the total adsorption isotherm data. The virial coefficients are shown on the right.

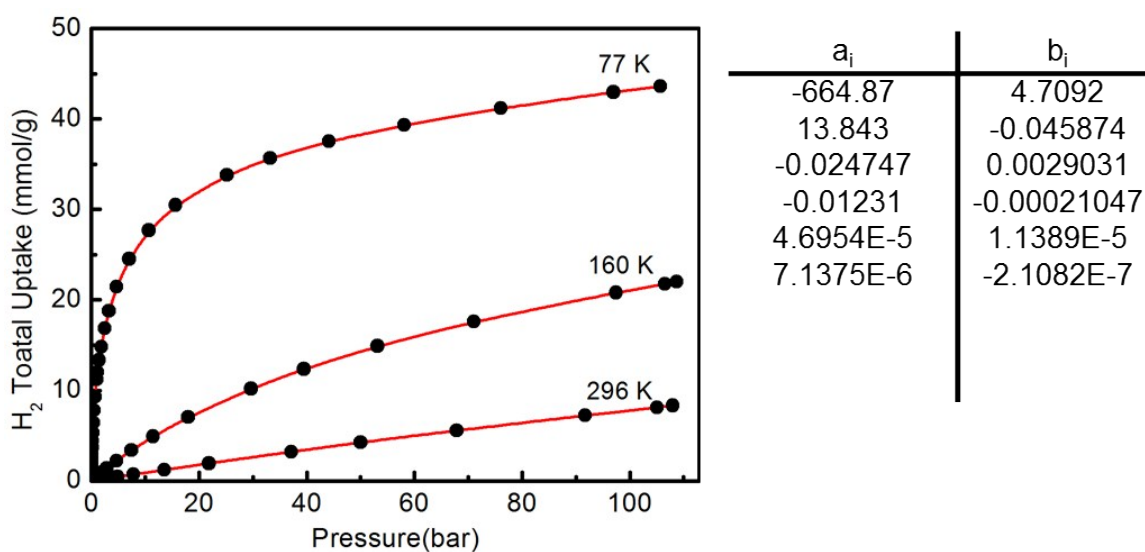

**Figure S27.** Derivation of  $Q_{st}$  for  $H_2$  adsorption in PCN-46a from virial fitting of the total adsorption isotherm data. The virial coefficients are shown on the right.

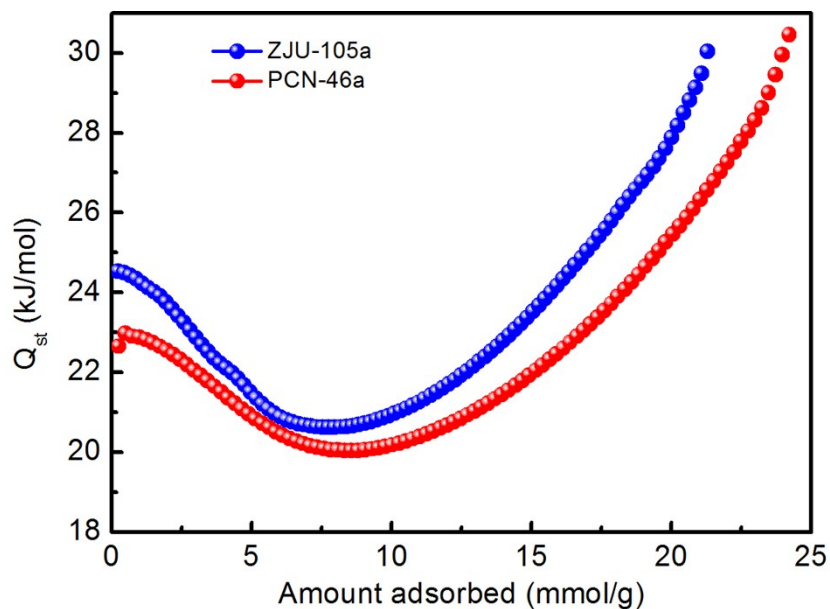

**Figure S28.** Comparison of  $Q_{st}$  for  $\text{CO}_2$  adsorption for ZJU-105a and PCN-46a.

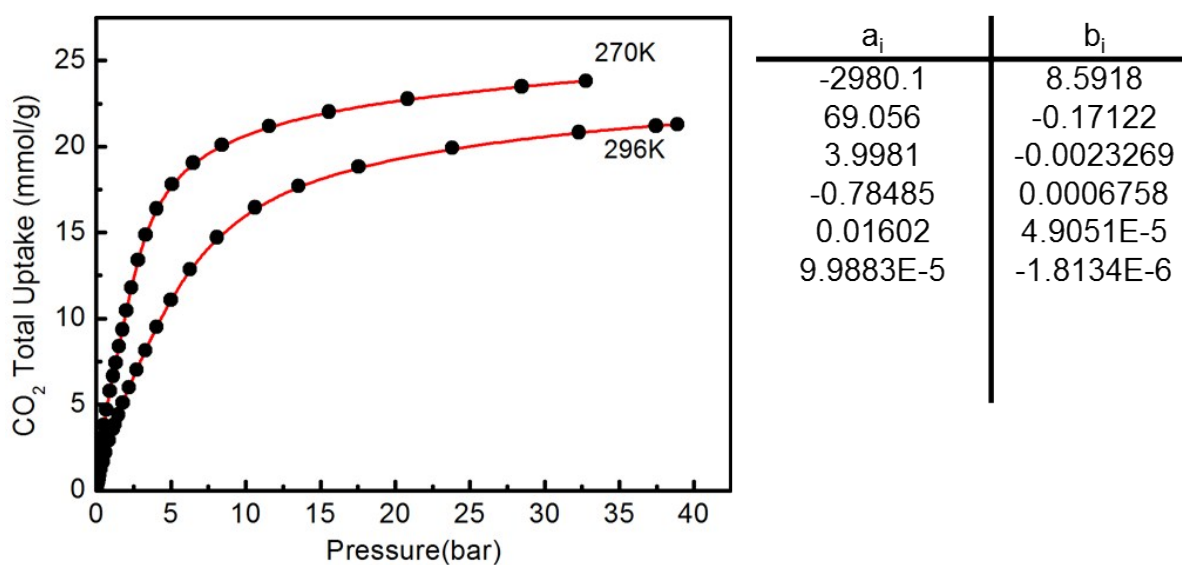

**Figure S29.** Derivation of  $Q_{st}$  for  $\text{CO}_2$  adsorption in ZJU-105a from virial fitting of the total adsorption isotherm data. The virial coefficients are shown on the right.

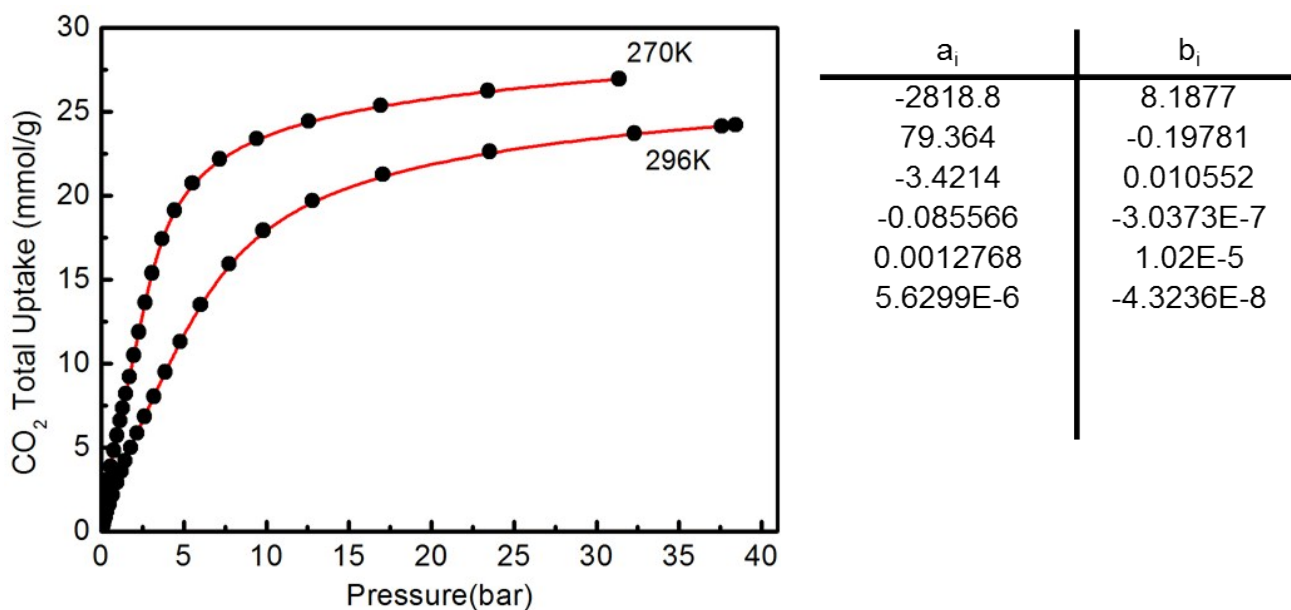

**Figure S30.** Derivation of  $Q_{st}$  for CO<sub>2</sub> adsorption in PCN-46a from virial fitting of the total adsorption isotherm data. The virial coefficients are shown on the right.

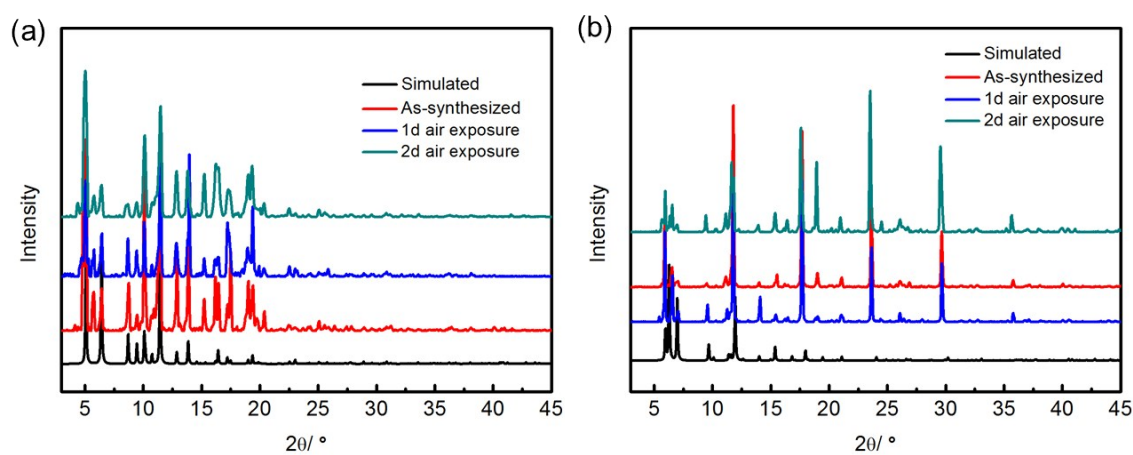

**Figure S31.** PXRD patterns of the as-synthesized ZJU-105 sample (a) and PCN-46 sample (b) after exposure to air for one or two days, respectively.

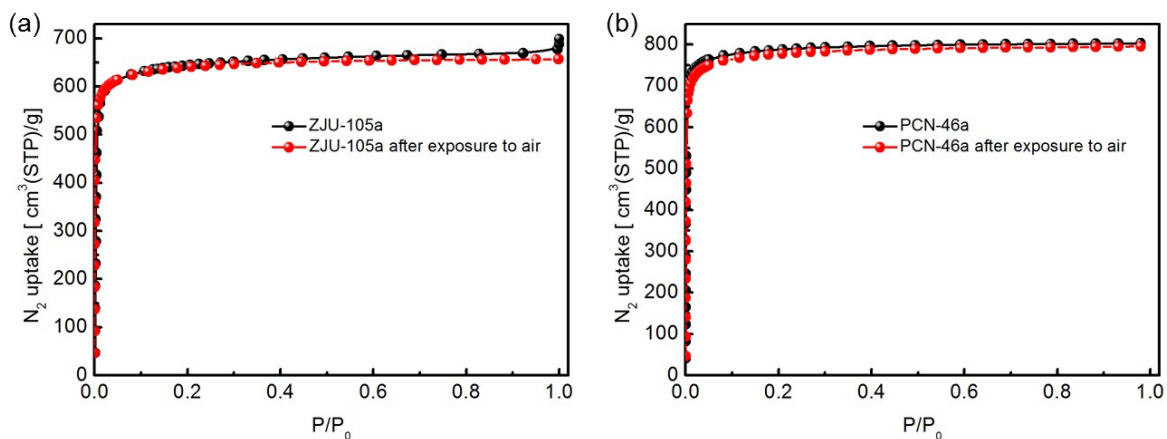

**Figure S32.** Comparison of  $N_2$  adsorption isotherms of (a) ZJU-105a and (b) PCN-46a with the re-activated samples after exposure to air for two days, showing their relatively good air stability.

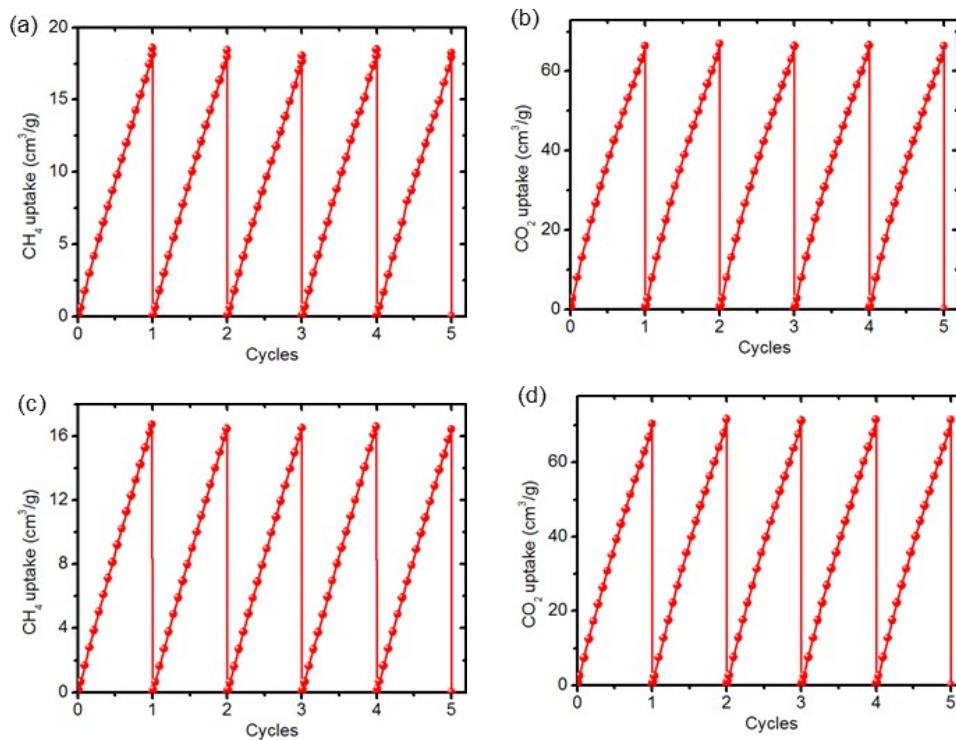

**Figure S33.** Cycles of  $CH_4$  and  $CO_2$  adsorption for ZJU-105a (a and b) and PCN-46a (c and d) at 298 K, indicating their good recyclability for gas storage.

**Table S1.** Crystallographic data and structure refinement results for ZJU-105 (from single-crystal X-ray diffraction analysis on the as-synthesized sample).

| ZJU-105                                          |                                |
|--------------------------------------------------|--------------------------------|
| Formula                                          | $C_{36}H_{18}Cu_2O_{10}$       |
| Formula weight                                   | 737.58                         |
| Temperature/K                                    | 296(2)                         |
| Crystal system                                   | Trigonal                       |
| Space group                                      | R-3m                           |
| $a, b$ (Å)                                       | 18.6721(4)                     |
| $c$ (Å)                                          | 52.020(2)                      |
| $\alpha$ (°)                                     | 90                             |
| $\beta$ (°)                                      | 90                             |
| $\gamma$ (°)                                     | 120                            |
| $V$ (Å <sup>3</sup> )                            | 15706.8(10)                    |
| $Z$                                              | 9                              |
| $D_{\text{calcd}}$ (g cm <sup>-3</sup> )         | 0.702                          |
| $\mu$ (mm <sup>-1</sup> )                        | 0.637                          |
| $F(000)$                                         | 3348                           |
| Crystal size/mm <sup>3</sup>                     | $0.32 \times 0.28 \times 0.24$ |
| GOF                                              | 1.059                          |
| $R_{\text{int}}$                                 | 0.0250                         |
| $R_1, wR_2$ [ $I \geq 2\sigma(I)$ ]              | 0.0578, 0.1881                 |
| $R_1, wR_2$ [all data]                           | 0.0725, 0.2080                 |
| Largest diff. peak and hole (e Å <sup>-3</sup> ) | 0.847 and -0.464               |
| CCDC number                                      | 1943325                        |



**Table S2.** Comparison of some promising MOFs for high-pressure CH<sub>4</sub> storage at 65/80 bar and 298

K.

| MOFs            | $S_{\text{BET}}^a$<br>(m <sup>2</sup> /g) | $V_p^b$<br>(cm <sup>3</sup> /g) | $D_c^c$<br>(g/cm <sup>3</sup> ) | total uptake<br>at 65 bar<br>cm <sup>3</sup> /cm <sup>3</sup> | Working capacity<br>(5-65 bar)<br>cm <sup>3</sup> /cm <sup>3</sup> | Total uptake<br>at 80 bar<br>cm <sup>3</sup> /cm <sup>3</sup> | Working capacity<br>(5-80 bar)<br>cm <sup>3</sup> /cm <sup>3</sup> | $Q_{\text{st}}$<br>(kJ/mol) | Ref.             |
|-----------------|-------------------------------------------|---------------------------------|---------------------------------|---------------------------------------------------------------|--------------------------------------------------------------------|---------------------------------------------------------------|--------------------------------------------------------------------|-----------------------------|------------------|
| <b>PCN-46a</b>  | <b>3224</b>                               | <b>1.243</b>                    | <b>0.619<sup>d</sup></b>        | <b>233</b>                                                    | <b>190</b>                                                         | <b>246</b>                                                    | <b>203</b>                                                         | <b>14.2</b>                 | <b>This work</b> |
| <b>ZJU-105a</b> | <b>2608</b>                               | <b>1.037</b>                    | <b>0.660</b>                    | <b>228</b>                                                    | <b>175</b>                                                         | <b>243</b>                                                    | <b>190</b>                                                         | <b>16.58</b>                | <b>This work</b> |
| NOTT-102a       | 3342                                      | 1.268                           | 0.587                           | 233                                                           | 185                                                                | -                                                             | -                                                                  | 14.90                       | 3                |
| MFM-115a        | 3394                                      | 1.38                            | 0.611                           | 238                                                           | 191                                                                | 256                                                           | 208                                                                | 16.3                        | 4                |
| MOF-905         | 3490                                      | 1.34                            | 0.537                           | 206                                                           | 181                                                                | 228                                                           | 203                                                                | 11.7                        | 5                |
| Al-soc-MOF-1    | 5585                                      | 2.3                             | 0.34                            | 197                                                           | 176                                                                | 221                                                           | 201                                                                | 11.0                        | 6                |
| HKUST-1         | 1850                                      | 0.78                            | 0.883                           | 267                                                           | 190                                                                | 272                                                           | 200                                                                | 17.0                        | 7,12             |
| MFM-112a        | 3800                                      | 1.62                            | 0.503                           | 218                                                           | 181                                                                | 236                                                           | 200                                                                | 16.2                        | 4                |
| NJU-Bai 43      | 3090                                      | 1.22                            | 0.639                           | 254                                                           | 198                                                                | -                                                             | -                                                                  | 14.45                       | 8                |
| UTSA-110        | 3241                                      | 1.263                           | 0.600                           | 241                                                           | 193                                                                | -                                                             | -                                                                  | 14.5                        | 3                |
| UTSA-76         | 2820                                      | 1.09                            | 0.699                           | 257                                                           | 197                                                                | -                                                             | -                                                                  | 15.5                        | 9                |
| Co(BDP)         | 2911                                      | 1.02                            | 0.774                           | 203                                                           | 197                                                                | 203                                                           | 197                                                                | 13                          | 10               |
| MAF-38          | 2022                                      | 0.808                           | 0.761                           | 263                                                           | 187                                                                | 273                                                           | 197                                                                | 21.6                        | 11               |
| NJU-Bai 42      | 2830                                      | 1.07                            | 0.693                           | 247                                                           | 193                                                                | -                                                             | -                                                                  | 14.49                       | 8                |
| Nu-125          | 3120                                      | 1.29                            | 0.578                           | 232                                                           | 183                                                                | -                                                             | -                                                                  | 15.1                        | 7                |
| NU-111          | 4930                                      | 2.09                            | 0.409                           | 206                                                           | 179                                                                | -                                                             | -                                                                  | 14.2                        | 7                |
| FDM-8           | 3643                                      | 1.54                            | 0.563                           | 193                                                           | 171                                                                | 215                                                           | 193                                                                | 10.4                        | 13               |
| MOF-905-Naph    | 3310                                      | 1.25                            | 0.585                           | 201                                                           | 172                                                                | 217                                                           | 188                                                                | 11.3                        | 5                |
| MOF-205         | 4460                                      | 2.16                            | 0.38                            | 185                                                           | 166                                                                | 205                                                           | 186                                                                | 10.6                        | 14               |
| MOF-177         | 4500                                      | 1.89                            | 0.427                           | 187                                                           | 167                                                                | 205                                                           | 185                                                                | 9.9                         | 14               |
| MOF-905-Me2     | 3640                                      | 1.39                            | 0.568                           | 213                                                           | 186                                                                | 211                                                           | 184                                                                | 10.3                        | 5                |
| PCN-14          | 2000                                      | 0.85                            | 0.829                           | 230                                                           | 157                                                                | 250                                                           | 178                                                                | 18.7                        | 7,12             |
| MOF-5           | 3800                                      | 1.55                            | 0.590                           | 203                                                           | 181                                                                | 198                                                           | 176                                                                | 10.0                        | 7,12             |
| Cu-tbo-MOF-5    | 3971                                      | 1.12                            | 0.595                           | 199                                                           | 158                                                                | 216                                                           | 175                                                                | 20.4                        | 15               |
| MOF-950         | 3440                                      | 1.30                            | 0.517                           | 195                                                           | 160                                                                | 209                                                           | 174                                                                | 11.9                        | 5                |
| MFM-132a        | 2466                                      | 1.06                            | 0.650                           | 201                                                           | 150                                                                | 213                                                           | 162                                                                | 15.7                        | 4                |
| X-dia-1-Ni      | -                                         | 0.648                           | 0.852                           | 189                                                           | 149                                                                | -                                                             | -                                                                  | -                           | 15               |
| MOF-210         | 6240                                      | 3.6                             | 0.25                            | 141                                                           | 128                                                                | 166                                                           | 153                                                                | -                           | 5                |
| Ni-MOF-74       | 1350                                      | 0.51                            | 1.206                           | 251                                                           | 129                                                                | 267                                                           | 152                                                                | 21.4                        | 7,12             |

<sup>a</sup> BET surface areas calculated from N<sub>2</sub> isotherms at 77 K. <sup>b</sup> Pore volumes calculated from the maximum amounts of N<sub>2</sub> adsorbed. <sup>c</sup> Crystal densities without guest molecules and terminal water molecules. <sup>d</sup> Calculated from the crystal density of the activated PCN-46a originated from the literature 35.

**Table S3.** Comparison of some promising MOFs for high-pressure CH<sub>4</sub> storage at 100 bar and 298

K.

| MOFs            | $S_{\text{BET}}^a$<br>(m <sup>2</sup> /g) | $V_p^b$<br>(cm <sup>3</sup> /g) | $D_c^c$<br>(g/cm <sup>3</sup> ) | total uptake<br>at 100 bar<br>cm <sup>3</sup> /cm <sup>3</sup> | Working capacity<br>(5-100 bar)<br>cm <sup>3</sup> /cm <sup>3</sup> | $Q_{\text{st}}$<br>(kJ/mol) | Ref.             |
|-----------------|-------------------------------------------|---------------------------------|---------------------------------|----------------------------------------------------------------|---------------------------------------------------------------------|-----------------------------|------------------|
| <b>PCN-46a</b>  | <b>3224</b>                               | <b>1.243</b>                    | <b>0.619</b>                    | <b>260</b>                                                     | <b>217</b>                                                          | <b>14.2</b>                 | <b>This work</b> |
| <b>ZJU-105a</b> | <b>2608</b>                               | <b>1.037</b>                    | <b>0.660</b>                    | <b>258</b>                                                     | <b>203</b>                                                          | <b>16.58</b>                | <b>This work</b> |
| HKUST-1         | 1850                                      | 0.78                            | 0.883                           | 279                                                            | 207                                                                 | 17.0                        | 7,12             |
| MOF-205         | 4460                                      | 2.16                            | 0.38                            | 220                                                            | 201                                                                 | 10.6                        | 5                |
| MOF-177         | 4500                                      | 1.89                            | 0.427                           | 238                                                            | 218                                                                 | 9.9                         | 5                |
| PCN-14          | 2000                                      | 0.85                            | 0.829                           | 263                                                            | 191                                                                 | 18.7                        | 7,12             |
| MOF-5           | 3800                                      | 1.55                            | 0.590                           | 249                                                            | 227                                                                 | 10.0                        | 5                |
| MOF-210         | 6240                                      | 3.6                             | 0.25                            | 202                                                            | 189                                                                 | -                           | 5                |
| Ni-MOF-74       | 1350                                      | 0.51                            | 1.206                           | 228                                                            | 113                                                                 | 21.4                        | 7,12             |

<sup>a</sup> BET surface areas calculated from N<sub>2</sub> isotherms at 77 K. <sup>b</sup> Pore volumes calculated from the maximum amounts of N<sub>2</sub> adsorbed. <sup>c</sup> Crystal densities without guest molecules and terminal water molecules.

**Table S4.** Comparison of H<sub>2</sub> Adsorption Data for a Variety of MOFs.

| MOFs            | $S_{\text{BET}}^a$<br>(m <sup>2</sup> /g) | $V_p^b$<br>(cm <sup>3</sup> /g) | $D_c^c$<br>(g/cm <sup>3</sup> ) | Total H <sub>2</sub> uptake |             |           |           | Ref.             |
|-----------------|-------------------------------------------|---------------------------------|---------------------------------|-----------------------------|-------------|-----------|-----------|------------------|
|                 |                                           |                                 |                                 | g/L                         | wt%         | T (K)     | P (bar)   |                  |
| <b>PCN-46a</b>  | <b>3224</b>                               | <b>1.243</b>                    | <b>0.619</b>                    | <b>50</b>                   | <b>7.47</b> | <b>77</b> | <b>65</b> | <b>This work</b> |
| <b>ZJU-105a</b> | <b>2608</b>                               | <b>1.037</b>                    | <b>0.660</b>                    | <b>48</b>                   | <b>6.78</b> | <b>77</b> | <b>65</b> | <b>This work</b> |
| NOTT-102a       | 3342                                      | 1.268                           | 0.587                           | 42                          | 6.72        | 78        | 65        | 16               |
| MOF-5           | 3320                                      | 1.38                            | 0.610                           | 50                          | 7.58        | 77        | 65        | 17               |
| NU-111          | 4930                                      | 2.09                            | 0.409                           | 49                          | 10.71       | 77        | 65        | 18               |
| MOF-177         | 4500                                      | 1.89                            | 0.427                           | 49                          | 10.29       | 77        | 65        | 19               |
| IRMOF-20        | 3409                                      | 1.53                            | 0.511                           | 48                          | 8.59        | 77        | 65        | 17               |
| NU-100          | 6143                                      | 2.82                            | 0.273                           | 47                          | 14.68       | 77        | 65        | 20               |
| NU-800          | 3149                                      | 1.34                            | 0.554                           | 44                          | 7.36        | 77        | 65        | 21               |
| NU-1100         | 4020                                      | 1.53                            | 0.467                           | 43                          | 8.42        | 77        | 65        | 22               |
| MOF-210         | 6240                                      | 3.6                             | 0.250                           | 41                          | 14.09       | 77        | 65        | 23               |
| MOF-200         | 4530                                      | 3.59                            | 0.22                            | 36                          | 14.06       | 77        | 65        | 23               |
| PCN-68          | 5109                                      | 2.13                            | 0.380                           | 35                          | 8.43        | 77        | 65        | 24               |

<sup>a</sup> BET surface areas calculated from N<sub>2</sub> isotherms at 77 K. <sup>b</sup> Pore volumes calculated from the maximum amounts of N<sub>2</sub> adsorbed. <sup>c</sup> Crystal densities without guest molecules and terminal water molecules.

**Table S5.** Comparison of CO<sub>2</sub> Adsorption Data for a Variety of MOFs at RT.

| MOFs            | $S_{\text{BET}}^a$<br>(m <sup>2</sup> /g) | $V_p^b$<br>(cm <sup>3</sup> /g) | $D_c^c$<br>(g/cm <sup>3</sup> ) | Total uptake at 30 bar |                                  | Ref.             |
|-----------------|-------------------------------------------|---------------------------------|---------------------------------|------------------------|----------------------------------|------------------|
|                 |                                           |                                 |                                 | g/g                    | cm <sup>3</sup> /cm <sup>3</sup> |                  |
| <b>PCN-46a</b>  | <b>3224</b>                               | <b>1.243</b>                    | <b>0.619</b>                    | <b>1.04</b>            | <b>328</b>                       | <b>This work</b> |
| <b>ZJU-105a</b> | <b>2608</b>                               | <b>1.037</b>                    | <b>0.660</b>                    | <b>0.91</b>            | <b>309</b>                       | <b>This work</b> |
| NU-111          | 4930                                      | 2.09                            | 0.409                           | 1.68                   | 350                              | 18               |
| PCN-11          | 1931                                      | 0.91                            | 0.749                           | 0.87                   | 333                              | 25               |
| NiMOF-74        | 1218                                      | 0.47                            | 1.206                           | 0.54                   | 332                              | 26               |
| NU-140          | 4300                                      | 1.97                            | 0.426                           | 1.52                   | 330                              | 27               |
| NOTT-101        | 2805                                      | 1.08                            | 0.684                           | 0.95                   | 328                              | 16               |
| ZJU-35a         | 2899                                      | 1.16                            | 0.657                           | 0.97                   | 326                              | 28               |
| NU-125          | 3120                                      | 1.29                            | 0.578                           | 1.10                   | 324                              | 29               |
| PCN-61          | 3000                                      | 1.36                            | 0.560                           | 1.11                   | 318                              | 24               |
| MOF-177         | 4500                                      | 1.89                            | 0.427                           | 1.45                   | 315                              | 30               |
| ZJU-5a          | 2823                                      | 1.07                            | 0.679                           | 0.91                   | 313                              | 31               |
| MIL-101c        | 4230                                      | 2.15                            | 0.440                           | 1.39                   | 313                              | 32               |
| ZJU-36a         | 4014                                      | 1.60                            | 0.496                           | 1.24                   | 312                              | 28               |
| MOF-205         | 4460                                      | 2.16                            | 0.380                           | 1.61                   | 312                              | 23               |
| UTSA-20         | 1655                                      | 0.63                            | 0.910                           | 0.67                   | 312                              | 33               |
| Cu-TDPAT        | 1938                                      | 0.93                            | 0.782                           | 0.77                   | 306                              | 34               |
| NU-100          | 6143                                      | 2.82                            | 0.273                           | 1.76                   | 245                              | 20               |
| MOF-210         | 6240                                      | 3.6                             | 0.250                           | 1.70                   | 216                              | 23               |

<sup>a</sup> BET surface areas calculated from N<sub>2</sub> isotherms at 77 K. <sup>b</sup> Pore volumes calculated from the maximum amounts of N<sub>2</sub> adsorbed. <sup>c</sup> Crystal densities without guest molecules and terminal water molecules.

Disclaimer: Certain commercial equipment, instruments, or materials are identified in this paper to foster understanding. Such identification does not imply recommendation or endorsement by the National Institute of Standards and Technology, nor does it imply that the materials or equipment identified are necessarily the best available for the purpose.

## Reference

1. W. Zhou, H. Wu, M. R. Hartman and T. Yildirim, *J. Phys. Chem. C*, 2007, **111**, 16131.
2. A. L. Spek, *J. Appl. Crystallogr.*, 2003, **36**, 7.
3. H.-M. Wen, B. Li, L. Li, R.-B. Lin, W. Zhou, G. Qian and B. Chen, *Adv. Mater.*, 2018, **30**, 1704792.
4. Y. Yan, D. I. Kolokolov, I. d. Silva, A. G Stepanov, A. J. Blake, A. Dailly, P. Manuel, C. C Tang, S. Yang and M. Schröder, *J. Am. Chem. Soc.*, 2017, **139**, 13349.
5. J. Jiang, H. Furukawa, Y.-B. Zhang and O. M. Yaghi, *J. Am. Chem. Soc.*, 2016, **138**, 10244.
6. D. Alezi, Y. Belmabkhout, M. Suyetin, P. M. Bhatt, Ł. J. Weseliński, V. Solovyeva, K. Adil, I. Spanopoulos, P. N. Trikalitis, A.-H. Emwas and M. Eddaoudi, *J. Am. Chem. Soc.*, 2015, **137**, 13308.
7. Y. Peng, V. Krungleviciute, I. Eryazici, J. T. Hupp, O. K. Farha and T. Yildirim, *J. Am. Chem. Soc.*, 2013, **135**, 11887.
8. M. Zhang, W. Zhou, T. Pham, K. A. Forrest, W. Liu, Y. He, H. Wu, T. Yildirim, B. Chen, B. Space, Y. Pan, M. J. Zaworotko and J. Bai, *Angew. Chem., Int. Ed.*, 2017, **56**, 11426.
9. B. Li, H.-M. Wen, H. Wang, H. Wu, M. Tyagi, T. Yildirim, W. Zhou and B. Chen, *J. Am. Chem. Soc.*, 2014, **136**, 6207.
10. J. A. Mason, J. Oktawiec, M. K. Taylor, M. R. Hudson, J. Rodriguez, J. E. Bachman, M. I. Gonzalez, A. Cervellino, A. Guagliardi, C. M. Brown, P. L. Llewellyn, N. Masciocchi and J. R. Long, *Nature*, 2015, **527**, 357.
11. J.-M. Lin, C.-T. He, Y. Liu, P.-Q. Liao, D.-D. Zhou, J.-P. Zhang and X.-M. Chen, *Angew. Chem., Int. Ed.*, 2016, **55**, 4752.
12. J. A. Mason, M. Veenstra and J. R. Long, *Chem. Sci.*, 2014, **5**, 32.
13. B. Tu, L. Diestel, Z.-L. Shi, W. R. L. N. Bandara, Y. Chen, W. Lin, Y.-B. Zhang, S. G. Telfer and Q. Li, *Angew. Chem., Int. Ed.*, 2019, **131**, 5402.
14. F. Gándara, H. Furukawa, S. Lee and O. M. Yaghi, *J. Am. Chem. Soc.*, 2014, **136**, 5271.
15. I. Spanopoulos, C. Tsangarakis, E. Klontzas, E. Tylianakis, G. Froudakis, K. Adil, Y. Belmabkhout, M. Eddaoudi and P. N. Trikalitis, *J. Am. Chem. Soc.*, 2016, **138**, 1568.
16. X. Lin, I. Telepeni, A. J. Blake, A. Dailly, C. M. Brown, J. M. Simmons, M. Zoppi, G. S. Walker, K. M. Thomas, T. J. Mays, P. Hubberstey, N. R. Champness and M. Schröder, *J. Am. Chem. Soc.*, 2009, **131**, 2159.
17. A. Ahmed, Y. Liu, J. Purewal, L. D. Tran, A. G. Wong-Foy, M. Veenstra, A. J. Matzger and D. J. Siegel, *Energy Environ. Sci.*, 2017, **10**, 2459.
18. Y. Peng, G. Srinivas, C. E. Wilmer, I. Eryazici, R. Q. Snurr, J. T. Hupp, T. Yildirim and O. K. Farha, *Chem. Commun.*, 2013, **49**, 2992.
19. H. Furukawa, M. A. Miller and O. M. Yaghi, *J. Mater. Chem.*, 2007, **17**, 3197.
20. O. K. Farha, A. O. Yazaydin, I. Eryazici, C. D. Malliakas, B. G. Hauser, M. G. Kanatzidis, S. T. Nguyen, R. Q. Snurr and J. T. Hupp, *Nat. Chem.*, 2010, **2**, 944.
21. D. A. Gomez-Gualdrón, O. V. Gutov, V. Krungleviciute, B. Borah, J. E. Mondloch, J. T. Hupp, T. Yildirim, O. K. Farha and R. Q. Snurr, *Chem. Mater.*, 2014, **26**, 5632.
22. O. V. Gutov, W. Bury, D. A. Gomez-Gualdrón, V. Krungleviciute, D. Fairen-Jimenez, J. E. Mondloch, A. A. Sarjeant, S. S. Al-Juaid, R. Q. Snurr, J. T. Hupp, T. Yildirim and O. K. Farha, *Chem. – Eur. J.*, 2014, **20**, 12389.
23. H. Furukawa, N. Ko, Y. B. Go, N. Aratani, S. B. Choi, E. Choi, A. Ö. Yazaydin, R. Q. Snurr, M. O’Keeffe, J. Kim and O. M. Yaghi, *Science*, 2010, **329**, 424.
24. D. Yuan, D. Zhao, D. Sun and H.-C. Zhou, *Angew. Chem., Int. Ed.*, 2010, **49**, 5357.

25. J. M. Simmons, H. Wu, W. Zhou and T. Yildirim, *Energy Environ. Sci.*, 2011, **4**, 2177.
26. P. D. C. Dietzel, V. Besikiotis and R. Blom, *J. Mater. Chem.*, 2009, **19**, 7362.
27. G. Barin, V. Krungleviciute, D. A. Gomez-Gualdron, A. A. Sarjeant, R. Q. Snurr, J. T. Hupp, T. Yildirim and O. K. Farha, *Chem. Mater.*, 2014, **26**, 1912.
28. G.-Q. Kong, Z.-D. Han, Y. He, S. Ou, W. Zhou, T. Yildirim, R. Krishna, C. Zou, B. Chen and C.-D. Wu, *Chem. – Eur. J.*, 2013, **19**, 14886.
29. C. E. Wilmer, O. K. Farha, T. Yildirim, I. Eryazici, V. Krungleviciute, A. A. Sarjeant, R. Q. Snurr and J. T. Hupp, *Energy Environ. Sci.*, 2013, **6**, 1158.
30. A. R. Millward and O. M. Yaghi, *J. Am. Chem. Soc.*, 2005, **127**, 17998.
31. X. Rao, J. Cai, J. Yu, Y. He, C. Wu, W. Zhou, T. Yildirim, B. Chen and G. Qian, *Chem. Commun.*, 2013, **49**, 6719.
32. P. L. Llewellyn, S. Bourrelly, C. Serre, A. Vimont, M. Daturi, L. Hamon, G. D. Weireld, J.-S. Chang, D.-Y. Hong, Y. K. Hwang, S. H. Jung and G. Férey, *Langmuir*, 2008, **24**, 7245.
33. Z. Guo, H. Wu, G. Srinivas, Y. Zhou, S. Xiang, Z. Chen, Y. Yang, W. Zhou, M. O'Keeffe and B. Chen, *Angew. Chem., Int. Ed.*, 2011, **50**, 3178.
34. B. Li, Z. Zhang, Y. Li, K. Yao, Y. Zhu, Z. Deng, F. Yang, X. Zhou, G. Li, H. Wu, N. Nijem, Y. J. Chabal, Z. Lai, Y. Han, Z. Shi, S. Feng and J. Li, *Angew. Chem., Int. Ed.*, 2011, **51**, 1412.
35. D. Zhao, D. Yuan, A. Yakovenko and H.-C. Zhou, *Chem. Commun.*, 2010, **46**, 4196.
